# Supplementary material for: Genetic and karyotype divergence between parents affect clonality and sterility in hybrids
Source: bioRxiv preprint, doi:10.1101/2023.04.11.536494, version 2 (2023-08-13)
Supplement: Supplementary Table 3 [file 536494_file04.xlsx]

## Sheet: Supplementary table 3
ID	family ID	sc	biotyp	sex	AKD	reprod
Cobex25_30119	Cobex25	12	EO	F	14	sterile
Cobex25_30119	Cobex25	11	EO	F	14	sterile
Cobex25_30119	Cobex25	15	EO	F	14	sterile
Cobex25_30119	Cobex25	11	EO	F	14	sterile
Cobex25_30119	Cobex25	15	EO	F	14	sterile
Cobex25_30119	Cobex25	16	EO	F	14	sterile
Cobex25_30119	Cobex25	11	EO	F	14	sterile
Cobex25_30119	Cobex25	8	EO	F	14	sterile
Cobex25_30119	Cobex25	13	EO	F	14	sterile
Cobex25_30119	Cobex25	13	EO	F	14	sterile
Cobex25_30119	Cobex25	14	EO	F	14	sterile
Cobex25_30119	Cobex25	14	EO	F	14	sterile
Cobex25_30119	Cobex25	13	EO	F	14	sterile
Cobex25_30119	Cobex25	14	EO	F	14	sterile
Cobex25_1_160419F	Cobex25	13	EO	F	14	sterile
Cobex25_1_160419F	Cobex25	14	EO	F	14	sterile
Cobex25_1_160419F	Cobex25	11	EO	F	14	sterile
Cobex25_1_160419F	Cobex25	11	EO	F	14	sterile
Cobex25_1_160419F	Cobex25	11	EO	F	14	sterile
Cobex25_1_160419F	Cobex25	7	EO	F	14	sterile
Cobex25_1_160419F	Cobex25	10	EO	F	14	sterile
Cobex25_1_160419F	Cobex25	17	EO	F	14	sterile
Cobex25_1_160419F	Cobex25	15	EO	F	14	sterile
Cobex25_1_160419F	Cobex25	11	EO	F	14	sterile
Cobex25_1_160419F	Cobex25	14	EO	F	14	sterile
Cobex25_1_160419F	Cobex25	11	EO	F	14	sterile
Cobex25_1_160419F	Cobex25	12	EO	F	14	sterile
Cobex25_1_160419F	Cobex25	14	EO	F	14	sterile
Cobex25_1_160419F	Cobex25	10	EO	F	14	sterile
Cobex25_1_160419F	Cobex25	14	EO	F	14	sterile
Cobex25_1_160419F	Cobex25	13	EO	F	14	sterile
Cobex25_1_160419F	Cobex25	13	EO	F	14	sterile
Cobex25_1_160419F	Cobex25	10	EO	F	14	sterile
Cobex25_1_160419F	Cobex25	11	EO	F	14	sterile
Cobex25_1_160419F	Cobex25	14	EO	F	14	sterile
Cobex25_1_160419F	Cobex25	10	EO	F	14	sterile
Cobex25_1_160419F	Cobex25	13	EO	F	14	sterile
Cobex25_1_160419F	Cobex25	13	EO	F	14	sterile
Cobex25_1_160419F	Cobex25	10	EO	F	14	sterile
Cobex25_1_160419F	Cobex25	13	EO	F	14	sterile
Cobex25_1_160419F	Cobex25	10	EO	F	14	sterile
Cobex25_1_160419F	Cobex25	14	EO	F	14	sterile
Cobex25_1_160419F	Cobex25	15	EO	F	14	sterile
Cobex25_1_160419F	Cobex25	12	EO	F	14	sterile
Cobex25_1_160419F	Cobex25	12	EO	F	14	sterile
Cobex25_1_160419F	Cobex25	16	EO	F	14	sterile
Cobex25_1_160419F	Cobex25	16	EO	F	14	sterile
Cobex_30_2_szsp1_sysp3	Cobex30	12	EO	F	14	sterile
Cobex_30_2_szsp1_sysp3	Cobex30	13	EO	F	14	sterile
Cobex_30_2_szsp1_sysp3	Cobex30	13	EO	F	14	sterile
Cobex_30_2_szsp1_sysp3	Cobex30	15	EO	F	14	sterile
Cobex_30_2_szsp1_sysp3	Cobex30	14	EO	F	14	sterile
Cob_25_2_1604	Cobex25	11	EO	F	14	sterile
Cob_25_2_1604	Cobex25	12	EO	F	14	sterile
Cob_25_2_1604	Cobex25	8	EO	F	14	sterile
Cob_25_2_1604	Cobex25	11	EO	F	14	sterile
Cob_25_2_1604	Cobex25	9	EO	F	14	sterile
Cob_25_2_1604	Cobex25	12	EO	F	14	sterile
Cob_25_2_1604	Cobex25	14	EO	F	14	sterile
Cob_25_2_1604	Cobex25	9	EO	F	14	sterile
Cob_25_2_1604	Cobex25	12	EO	F	14	sterile
Cob_25_2_1604	Cobex25	9	EO	F	14	sterile
Cob_25_2_1604	Cobex25	10	EO	F	14	sterile
Cob_25_2_1604	Cobex25	11	EO	F	14	sterile
Cob_25_2_1604	Cobex25	12	EO	F	14	sterile
Cob_25_2_1604	Cobex25	15	EO	F	14	sterile
Cob_25_2_1604	Cobex25	15	EO	F	14	sterile
Cob_25_2_1604	Cobex25	12	EO	F	14	sterile
Cob_25_2_1604	Cobex25	10	EO	F	14	sterile
19321Cobex30_1F_2_scp1+3	Cobex30	12	EO	F	14	sterile
19321Cobex30_1F_2_scp1+3	Cobex30	14	EO	F	14	sterile
19321Cobex30_1F_2_scp1+3	Cobex30	12	EO	F	14	sterile
19321Cobex30_1F_2_scp1+3	Cobex30	15	EO	F	14	sterile
19321Cobex30_1F_2_scp1+3	Cobex30	15	EO	F	14	sterile
19321Cobex30_1F_2_scp1+3	Cobex30	13	EO	F	14	sterile
19321Cobex30_1F_2_scp1+3	Cobex30	12	EO	F	14	sterile
19321Cobex30_1F_2_scp1+3	Cobex30	9	EO	F	14	sterile
19321Cobex30_1F_2_scp1+3	Cobex30	12	EO	F	14	sterile
19321Cobex30_1F_2_scp1+3	Cobex30	14	EO	F	14	sterile
19321Cobex30_1F_2_scp1+3	Cobex30	10	EO	F	14	sterile
19321Cobex30_1F_2_scp1+3	Cobex30	13	EO	F	14	sterile
19321Cobex30_1F_2_scp1+3	Cobex30	14	EO	F	14	sterile
19321Cobex30_1F_2_scp1+3	Cobex30	12	EO	F	14	sterile
19321Cobex30_1F_2_scp1+3	Cobex30	12	EO	F	14	sterile
19321Cobex30_1F_2_scp1+3	Cobex30	12	EO	F	14	sterile
19321Cobex30_1F_2_scp1+3	Cobex30	13	EO	F	14	sterile
19321Cobex30_1F_2_scp1+3	Cobex30	13	EO	F	14	sterile
Cobex30_OE_1F_1_scp3+mlh1	Cobex30	12	EO	F	14	sterile
Cobex30_OE_1F_1_scp3+mlh1	Cobex30	13	EO	F	14	sterile
Cobex30_OE_1F_1_scp3+mlh1	Cobex30	10	EO	F	14	sterile
Cobex30_OE_1F_1_scp3+mlh1	Cobex30	14	EO	F	14	sterile
Cobex30_OE_1F_1_scp3+mlh1	Cobex30	10	EO	F	14	sterile
19321cobex30_oe_2f_2	Cobex30	12	EO	F	14	sterile
19321cobex30_oe_2f_2	Cobex30	10	EO	F	14	sterile
19321cobex30_oe_2f_2	Cobex30	10	EO	F	14	sterile
19321cobex30_oe_2f_2	Cobex30	11	EO	F	14	sterile
19321cobex30_oe_2f_2	Cobex30	12	EO	F	14	sterile
19321cobex30_oe_2f_2	Cobex30	11	EO	F	14	sterile
19321cobex30_oe_2f_2	Cobex30	11	EO	F	14	sterile
19321cobex30_oe_2f_2	Cobex30	10	EO	F	14	sterile
19321cobex30_oe_2f_2	Cobex30	11	EO	F	14	sterile
19321cobex30_oe_2f_2	Cobex30	9	EO	F	14	sterile
19321cobex30_oe_2f_2	Cobex30	11	EO	F	14	sterile
Cobex_30_1_sycp1_sycp3	Cobex30	9	EO	M	14	sterile
Cobex_30_1_sycp1_sycp3	Cobex30	10	EO	M	14	sterile
Cobex_30_1_sycp1_sycp3	Cobex30	10	EO	M	14	sterile
Cobex_30_1_sycp1_sycp3	Cobex30	6	EO	M	14	sterile
Cobex_30_1_sycp1_sycp3	Cobex30	6	EO	M	14	sterile
Cobex_30_1_sycp1_sycp3	Cobex30	6	EO	M	14	sterile
Cobex_30_1_sycp1_sycp3	Cobex30	7	EO	M	14	sterile
Cobex_30_1_sycp1_sycp3	Cobex30	3	EO	M	14	sterile
Cobex_30_1_sycp1_sycp3	Cobex30	7	EO	M	14	sterile
Cobex_30_1_sycp1_sycp3	Cobex30	11	EO	M	14	sterile
Cobex_30_1_sycp1_sycp3	Cobex30	7	EO	M	14	sterile
Cobex_30_1_sycp1_sycp3	Cobex30	5	EO	M	14	sterile
Cobex_30_1_sycp1_sycp3	Cobex30	7	EO	M	14	sterile
Cobex_30_1_sycp1_sycp3	Cobex30	6	EO	M	14	sterile
Cobex_30_1_sycp1_sycp3	Cobex30	5	EO	M	14	sterile
Cobex_30_1_sycp1_sycp3	Cobex30	7	EO	M	14	sterile
Cobex_30_4_sycp1_sycp3	Cobex30	11	EO	M	14	sterile
8420Alex45_1_2	Alex_45	12	EO	F	14	asex
8420Alex45_1_2	Alex_45	16	EO	F	14	asex
8420Alex45_1_2	Alex_45	12	EO	F	14	asex
8420Alex45_1_2	Alex_45	11	EO	F	14	asex
8420Alex45_1_2	Alex_45	11	EO	F	14	asex
8420Alex45_1_2	Alex_45	9	EO	F	14	asex
8420Alex45_1_2	Alex_45	12	EO	F	14	asex
8420Alex45_1_2	Alex_45	7	EO	F	14	asex
8420Alex45_1_2	Alex_45	12	EO	F	14	asex
8420Alex45_1_2	Alex_45	12	EO	F	14	asex
8420Alex45_1_2	Alex_45	12	EO	F	14	asex
8420Alex45_1_2	Alex_45	13	EO	F	14	asex
8420Alex45_1_2	Alex_45	10	EO	F	14	asex
8420Alex45_1_2	Alex_45	12	EO	F	14	asex
8420Alex45_1_2	Alex_45	11	EO	F	14	asex
8420Alex45_1_2	Alex_45	12	EO	F	14	asex
8420Alex45_1_2	Alex_45	13	EO	F	14	asex
8420Alex45_1_2	Alex_45	10	EO	F	14	asex
8420Alex45_1_2	Alex_45	8	EO	F	14	asex
8420ALEX_45_1_2_scp1+3	Alex_45	7	EO	F	14	asex
8420ALEX_45_1_2_scp1+3	Alex_45	9	EO	F	14	asex
8420ALEX_45_1_2_scp1+3	Alex_45	12	EO	F	14	asex
8420ALEX_45_1_2_scp1+3	Alex_45	13	EO	F	14	asex
8420ALEX_45_1_2_scp1+3	Alex_45	14	EO	F	14	asex
8420ALEX_45_1_2_scp1+3	Alex_45	14	EO	F	14	asex
8420ALEX_45_1_2_scp1+3	Alex_45	12	EO	F	14	asex
8420ALEX_45_1_2_scp1+3	Alex_45	14	EO	F	14	asex
8420ALEX_45_1_2_scp1+3	Alex_45	12	EO	F	14	asex
8420ALEX_45_1_2_scp1+3	Alex_45	15	EO	F	14	asex
8420ALEX_45_1_2_scp1+3	Alex_45	14	EO	F	14	asex
8420ALEX_45_1_2_scp1+3	Alex_45	8	EO	F	14	asex
8420ALEX_45_1_2_scp1+3	Alex_45	9	EO	F	14	asex
8420ALEX_45_1_2_scp1+3	Alex_45	11	EO	F	14	asex
8420ALEX_45_1_2_scp1+3	Alex_45	13	EO	F	14	asex
8420ALEX_45_1_2_scp1+3	Alex_45	50	EO	F	14	asex
8420ALEX_45_1_2_scp1+3	Alex_45	10	EO	F	14	asex
8420ALEX_45_1_2_scp1+3	Alex_45	11	EO	F	14	asex
8420ALEX_45_1_2_scp1+3	Alex_45	12	EO	F	14	asex
8420ALEX_45_1_2_scp1+3	Alex_45	12	EO	F	14	asex
8420ALEX_45_1_2_scp1+3	Alex_45	10	EO	F	14	asex
8420ALEX_45_1_2_scp1+3	Alex_45	10	EO	F	14	asex
8420ALEX_45_1_2_scp1+3	Alex_45	11	EO	F	14	asex
8420ALEX_45_1_2_scp1+3	Alex_45	9	EO	F	14	asex
8420ALEX_45_1_2_scp1+3	Alex_45	11	EO	F	14	asex
8420ALEX_45_1_2_scp1+3	Alex_45	7	EO	F	14	asex
8420ALEX_45_1_2_scp1+3	Alex_45	13	EO	F	14	asex
8420ALEX_45_1_2_scp1+3	Alex_45	10	EO	F	14	asex
8420ALEX_45_1_2_scp1+3	Alex_45	16	EO	F	14	asex
8420ALEX_45_1_2_scp1+3	Alex_45	14	EO	F	14	asex
8420ALEX_45_1_2_scp1+3	Alex_45	9	EO	F	14	asex
2019alex_45_1	Alex_45	15	EO	F	14	asex
2019alex_45_1	Alex_45	15	EO	F	14	asex
2019alex_45_1	Alex_45	16	EO	F	14	asex
2019alex_45_1	Alex_45	12	EO	F	14	asex
2019alex_45_1	Alex_45	15	EO	F	14	asex
2019alex_45_1	Alex_45	13	EO	F	14	asex
2019alex_45_1	Alex_45	13	EO	F	14	asex
2019alex_45_1	Alex_45	15	EO	F	14	asex
2019alex_45_1	Alex_45	15	EO	F	14	asex
2019alex_45_1	Alex_45	13	EO	F	14	asex
2019alex_45_1	Alex_45	13	EO	F	14	asex
2019alex_45_1	Alex_45	13	EO	F	14	asex
13820Alex45_1_2scp1+3	Alex_45	16	EO	F	14	asex
13820Alex45_1_2scp1+3	Alex_45	14	EO	F	14	asex
13820Alex45_1_2scp1+3	Alex_45	10	EO	F	14	asex
13820Alex45_1_2scp1+3	Alex_45	12	EO	F	14	asex
13820Alex45_1_2scp1+3	Alex_45	13	EO	F	14	asex
13820Alex45_1_2scp1+3	Alex_45	12	EO	F	14	asex
13820Alex45_1_2scp1+3	Alex_45	13	EO	F	14	asex
13820Alex45_1_2scp1+3	Alex_45	16	EO	F	14	asex
13820Alex45_1_2scp1+3	Alex_45	15	EO	F	14	asex
13820Alex45_1_2scp1+3	Alex_45	11	EO	F	14	asex
13820Alex45_1_2scp1+3	Alex_45	14	EO	F	14	asex
13820Alex45_1_2scp1+3	Alex_45	12	EO	F	14	asex
13820Alex45_1_2scp1+3	Alex_45	17	EO	F	14	asex
Alex45_1m_2_scp3+mlh1	Alex_45	7	EO	M	14	sterile
Alex45_1m_2_scp3+mlh1	Alex_45	8	EO	M	14	sterile
Alex45_1m_2_scp3+mlh1	Alex_45	14	EO	M	14	sterile
Alex45_1m_2_scp3+mlh1	Alex_45	11	EO	M	14	sterile
Alex45_1m_2_scp3+mlh1	Alex_45	14	EO	M	14	sterile
201119Cobex24F_1	Cobex_24	19	OB	F	1	sexual
Cobex24_1.2.19	Cobex_24	23	OB	F	1	sexual
Cobex24_1.2.19	Cobex_24	23	OB	F	1	sexual
Cobex24_1.2.19	Cobex_24	23	OB	F	1	sexual
Cobex_29_1307_sycp3sycp1	Cobex_29	14	OB	F	1	sexual
Cobex_29_1307_sycp3sycp1	Cobex_29	12	OB	F	1	sexual
Cobex_29_1307_sycp3sycp1	Cobex_29	23	OB	F	1	sexual
Cobex_29_1307_sycp3sycp1	Cobex_29	24	OB	F	1	sexual
Cobex_29_1307_sycp3sycp1	Cobex_29	12	OB	F	1	sexual
Cobex_29_1307_sycp3sycp1	Cobex_29	21	OB	F	1	sexual
Cobex_29_1307_sycp3sycp1	Cobex_29	22	OB	F	1	sexual
Cobex_29_1307_sycp3sycp1	Cobex_29	16	OB	F	1	sexual
Cobex_29_1307_sycp3sycp1	Cobex_29	24	OB	F	1	sexual
Cobex_29_1307_sycp3sycp1	Cobex_29	20	OB	F	1	sexual
Cobex_29_1307_sycp3sycp1	Cobex_29	24	OB	F	1	sexual
Cobex_29_1307_sycp3sycp1	Cobex_29	18	OB	F	1	sexual
Cobex24or29_1F_1SCP3+mlh	Cobex_24	19	OB	F	1	sexual
Cobex24or29_1F_1SCP3+mlh	Cobex_24	16	OB	F	1	sexual
Cobex24or29_1F_1SCP3+mlh	Cobex_24	12	OB	F	1	sexual
Cobex24or29_1F_1SCP3+mlh	Cobex_24	22	OB	F	1	sexual
Cobex24or29_1F_1SCP3+mlh	Cobex_24	18	OB	F	1	sexual
Cobex24or29_1F_1SCP3+mlh	Cobex_24	22	OB	F	1	sexual
Cobex24or29_1F_1SCP3+mlh	Cobex_24	19	OB	F	1	sexual
Cobex24or29_1F_1SCP3+mlh	Cobex_24	19	OB	F	1	sexual
Cobex24or29_1F_1SCP3+mlh	Cobex_24	22	OB	F	1	sexual
Cobex24or29_1F_1SCP3+mlh	Cobex_24	19	OB	F	1	sexual
Cobex24or29_1F_1SCP3+mlh	Cobex_24	18	OB	F	1	sexual
Cobex24or29_1F_1SCP3+mlh	Cobex_24	24	OB	F	1	sexual
Cobex24or29_1F_1SCP3+mlh	Cobex_24	24	OB	F	1	sexual
Cobex24or29_1F_1SCP3+mlh	Cobex_24	25	OB	F	1	sexual
Cobex24or29_1F_1SCP3+mlh	Cobex_24	19	OB	F	1	sexual
Cobex24or29_1F_1SCP3+mlh	Cobex_24	18	OB	F	1	sexual
Cobex24or29_1F_1SCP3+mlh	Cobex_24	21	OB	F	1	sexual
Cobex24_29_1f_1scp1+3	Cobex_24	22	OB	F	1	sexual
Cobex24_29_1f_1scp1+3	Cobex_24	22	OB	F	1	sexual
Cobex24_29_1f_1scp1+3	Cobex_24	20	OB	F	1	sexual
Cobex24_29_1f_1scp1+3	Cobex_24	25	OB	F	1	sexual
Cobex24_29_1f_1scp1+3	Cobex_24	16	OB	F	1	sexual
Cobex24_29_1f_1scp1+3	Cobex_24	21	OB	F	1	sexual
Cobex24_29_1f_1scp1+3	Cobex_24	18	OB	F	1	sexual
Cobex24_29_1f_1scp1+3	Cobex_24	23	OB	F	1	sexual
Cobex24_29_1f_1scp1+3	Cobex_24	24	OB	F	1	sexual
Cobex24_29_1f_1scp1+3	Cobex_24	22	OB	F	1	sexual
Cobex24_29_1f_1scp1+3	Cobex_24	23	OB	F	1	sexual
Cobex24_29_1f_1scp1+3	Cobex_24	22	OB	F	1	sexual
Cobex24_29_1f_1scp1+3	Cobex_24	23	OB	F	1	sexual
Cobex24_29_1f_1scp1+3	Cobex_24	24	OB	F	1	sexual
Cobex24_29_1f_1scp1+3	Cobex_24	20	OB	F	1	sexual
Cobex24_29_1f_1scp1+3	Cobex_24	17	OB	F	1	sexual
Cobex24_29_1f_1scp1+3	Cobex_24	19	OB	F	1	sexual
Cobex24_29_1f_1scp1+3	Cobex_24	23	OB	F	1	sexual
Cobex24_29_1f_1scp1+3	Cobex_24	20	OB	F	1	sexual
Cobex24_29_1f_1scp1+3	Cobex_24	15	OB	F	1	sexual
Cobex24_29_1f_1scp1+3	Cobex_24	20	OB	F	1	sexual
Cobex24_29_1f_1scp1+3	Cobex_24	23	OB	F	1	sexual
Cobex24_29_1f_1scp1+3	Cobex_24	20	OB	F	1	sexual
Cobex24_29_1f_1scp1+3	Cobex_24	23	OB	F	1	sexual
Cobex24_29_1f_1scp1+3	Cobex_24	16	OB	F	1	sexual
Cobex24_29_1f_1scp1+3	Cobex_24	20	OB	F	1	sexual
Cobex24_29_1f_1scp1+3	Cobex_24	23	OB	F	1	sexual
Cobex24_29_1f_1scp1+3	Cobex_24	24	OB	F	1	sexual
Cobex24_29_1f_1scp1+3	Cobex_24	15	OB	F	1	sexual
Cobex24_29_1f_1scp1+3	Cobex_24	19	OB	F	1	sexual
Cobex24_29_1f_1scp1+3	Cobex_24	20	OB	F	1	sexual
Cobex24_29_1f_1scp1+3	Cobex_24	23	OB	F	1	sexual
Cobex24_29_1f_1scp1+3	Cobex_24	22	OB	F	1	sexual
OB_29_2	Cobex_29	17	OB	M	1	sterile
OB_29_2	Cobex_29	16	OB	M	1	sterile
OB_29_2	Cobex_29	18	OB	M	1	sterile
OB_29_2	Cobex_29	13	OB	M	1	sterile
OB_29_2	Cobex_29	18	OB	M	1	sterile
OB_29_2	Cobex_29	15	OB	M	1	sterile
OB_29_2	Cobex_29	18	OB	M	1	sterile
OB_29_2	Cobex_29	17	OB	M	1	sterile
OB_29_2	Cobex_29	16	OB	M	1	sterile
OB_29_2	Cobex_29	14	OB	M	1	sterile
OB_29_2	Cobex_29	17	OB	M	1	sterile
OB_29_2	Cobex_29	15	OB	M	1	sterile
OB_29_2	Cobex_29	16	OB	M	1	sterile
OB_29_2	Cobex_29	15	OB	M	1	sterile
OB_29_2	Cobex_29	13	OB	M	1	sterile
OB_29_2	Cobex_29	20	OB	M	1	sterile
OB_29_2	Cobex_29	18	OB	M	1	sterile
12.7.13_PS2F_SYCP1	2017PS	7	PS	F	10	asex
12.7.13_PS2F_SYCP1	2017PS	7	PS	F	10	asex
12.7.13_PS2F_SYCP1	2017PS	8	PS	F	10	asex
12.7.13_PS2F_SYCP1	2017PS	8	PS	F	10	asex
Cobex_1307_scp1_PS3f	2017PS	13	PS	F	10	asex
Cobex_1307_scp1_PS3f	2017PS	11	PS	F	10	asex
Cobex_1307_scp1_PS3f	2017PS	7	PS	F	10	asex
Cobex_1307_scp1_PS3f	2017PS	13	PS	F	10	asex
Cobex_1307_scp1_PS3f	2017PS	11	PS	F	10	asex
Cobex_1307_scp1_PS3f	2017PS	15	PS	F	10	asex
Cobex_1307_scp1_PS3f	2017PS	12	PS	F	10	asex
Cobex_1307_scp1_PS3f	2017PS	6	PS	F	10	asex
Cobex_1307_scp1_PS3f	2017PS	11	PS	F	10	asex
Cobex_1307_scp1_PS3f	2017PS	11	PS	F	10	asex
Cobex_1307_scp1_PS3f	2017PS	11	PS	F	10	asex
Cobex_1307_scp1_PS3f	2017PS	11	PS	F	10	asex
Cobex_1307_scp1_PS3f	2017PS	8	PS	F	10	asex
Cobex_1307_scp1_PS3f	2017PS	9	PS	F	10	asex
Cobex_1307_scp1_PS3f	2017PS	9	PS	F	10	asex
Cobex_1307_scp1_PS3f	2017PS	7	PS	F	10	asex
Cobex_1307_scp1_PS3f	2017PS	13	PS	F	10	asex
Cobex_1307_scp1_PS3f	2017PS	9	PS	F	10	asex
19321PS3F_1_scp1+3	2017PS	12	PS	F	10	asex
19321PS3F_1_scp1+3	2017PS	14	PS	F	10	asex
19321PS3F_1_scp1+3	2017PS	11	PS	F	10	asex
19321PS3F_1_scp1+3	2017PS	7	PS	F	10	asex
19321PS3F_1_scp1+3	2017PS	6	PS	F	10	asex
19321PS3F_2_scp3+mlh1	2017PS	7	PS	F	10	asex
19321PS3F_2_scp3+mlh1	2017PS	8	PS	F	10	asex
130719PE2F_mlh	2017EP	20	EP	F	4	asex
130719PE2F_mlh	2017EP	18	EP	F	4	asex
130719PE2F_mlh	2017EP	19	EP	F	4	asex
130719PE2F_mlh	2017EP	19	EP	F	4	asex
130719PE2F_mlh	2017EP	18	EP	F	4	asex
130719PE2F_mlh	2017EP	18	EP	F	4	asex
130719PE2F_mlh	2017EP	19	EP	F	4	asex
130719PE4F	2017EP	18	EP	F	4	asex
130719PE4F	2017EP	20	EP	F	4	asex
130719PE4F	2017EP	17	EP	F	4	asex
130719PE4F	2017EP	17	EP	F	4	asex
130719PE4F	2017EP	18	EP	F	4	asex
130719PE4F	2017EP	19	EP	F	4	asex
130719PE4F	2017EP	20	EP	F	4	asex
130719PE4F	2017EP	17	EP	F	4	asex
130719PE4F	2017EP	17	EP	F	4	asex
130719PE4F	2017EP	16	EP	F	4	asex
130719PE4F	2017EP	17	EP	F	4	asex
130719PE4F	2017EP	16	EP	F	4	asex
130719PE4F	2017EP	17	EP	F	4	asex
130719PE2F	2017EP	13	EP	F	4	asex
130719PE2F	2017EP	17	EP	F	4	asex
130719PE2F	2017EP	16	EP	F	4	asex
130719PE2F	2017EP	20	EP	F	4	asex
130719PE2F	2017EP	18	EP	F	4	asex
130719PE2F	2017EP	21	EP	F	4	asex
130719PE2F	2017EP	19	EP	F	4	asex
130719PE2F	2017EP	20	EP	F	4	asex
130719PE2F	2017EP	18	EP	F	4	asex
130719PE2F	2017EP	20	EP	F	4	asex
130719PE2F	2017EP	18	EP	F	4	asex
130719PE2F	2017EP	18	EP	F	4	asex
130719PE2F	2017EP	20	EP	F	4	asex
PE2F_SYCP3_1	2017EP	17	EP	F	4	asex
PE2F_SYCP3_1	2017EP	19	EP	F	4	asex
PS3F_1307_MLH1	2017PS	18	PS	F	10	asex
130719PE3m_mlh	2017EP	20	EP	M	4	sterile
130719PE3m_mlh	2017EP	19	EP	M	4	sterile
130719PE3m_mlh	2017EP	16	EP	M	4	sterile
130719PE3m_mlh	2017EP	12	EP	M	4	sterile
130719PE3m_mlh	2017EP	15	EP	M	4	sterile
130719PE3M_Sycp1	2017EP	10	EP	M	4	sterile
130719PE3M_Sycp1	2017EP	11	EP	M	4	sterile
130719PE3M_Sycp1	2017EP	17	EP	M	4	sterile
130719PE3M_Sycp1	2017EP	7	EP	M	4	sterile
130719PE3M_Sycp1	2017EP	12	EP	M	4	sterile
130719PE3M_Sycp1	2017EP	13	EP	M	4	sterile
130719PE3M_Sycp1	2017EP	13	EP	M	4	sterile
130719PE3M_Sycp1	2017EP	16	EP	M	4	sterile
130719PE3M_Sycp1	2017EP	13	EP	M	4	sterile
130719PE3M_Sycp1	2017EP	19	EP	M	4	sterile
130719PE3M_Sycp1	2017EP	15	EP	M	4	sterile
130719PE3M_Sycp1	2017EP	17	EP	M	4	sterile
130719PE3M_Sycp1	2017EP	15	EP	M	4	sterile
130719PE3M_Sycp1	2017EP	15	EP	M	4	sterile
130719PE3M_Sycp1	2017EP	15	EP	M	4	sterile
130719PE3M_Sycp1	2017EP	15	EP	M	4	sterile
130719PE3M_Sycp1	2017EP	12	EP	M	4	sterile
130719PE3M_Sycp1	2017EP	15	EP	M	4	sterile
130719PE3M_Sycp1	2017EP	15	EP	M	4	sterile
130719PE3M_Sycp1	2017EP	11	EP	M	4	sterile
130719PE3M_Sycp1	2017EP	15	EP	M	4	sterile
130719PE3M_Sycp1	2017EP	17	EP	M	4	sterile
130719PE3M_Sycp1	2017EP	16	EP	M	4	sterile
ES59_2_scp1+3	2017ES	8	ES	F	14	asex
ES59_2_scp1+3	2017ES	10	ES	F	14	asex
ES59_2_scp1+3	2017ES	7	ES	F	14	asex
ES59_2_scp1+3	2017ES	8	ES	F	14	asex
ES59_2_scp1+3	2017ES	8	ES	F	14	asex
ES59_2_scp1+3	2017ES	9	ES	F	14	asex
ES59_2_scp1+3	2017ES	8	ES	F	14	asex
719ES2m_SJCP1	2017ES	10	ES	M	14	sterile
719ES2m_SJCP1	2017ES	8	ES	M	14	sterile
719ES2m_SJCP1	2017ES	7	ES	M	14	sterile
1219cobex11_F	Cobex11	14	EB	F	15	asex
1219cobex11_F	Cobex11	8	EB	F	15	asex
1219cobex11_F	Cobex11	8	EB	F	15	asex
1219cobex11_F	Cobex11	8	EB	F	15	asex
Cob_11_2_16.04	Cobex11	11	EB	M	15	sterile
Cob_11_2_16.04	Cobex11	8	EB	M	15	sterile
Cob_11_2_16.04	Cobex11	7	EB	M	15	sterile
Cob_11_2_16.04	Cobex11	12	EB	M	15	sterile
Cob_11_2_16.04	Cobex11	10	EB	M	15	sterile
Cob_11_2_16.04	Cobex11	9	EB	M	15	sterile
Cob_11_2_16.04	Cobex11	13	EB	M	15	sterile
Cob_11_2_16.04	Cobex11	10	EB	M	15	sterile
Cob_11_2_16.04	Cobex11	9	EB	M	15	sterile
281120EB2M_1_MLH	2020EB	14	EB	M	15	sterile
281120EB2M_1_MLH	2020EB	6	EB	M	15	sterile
281120EB2M_1_MLH	2020EB	9	EB	M	15	sterile
281120EB2M_1_MLH	2020EB	11	EB	M	15	sterile
281120EB2M_1_MLH	2020EB	9	EB	M	15	sterile
Cobex_12_1_ET_fem	Cobex_12	13	ET	F	12	asex
Cobex_12_1_ET_fem	Cobex_12	11	ET	F	12	asex
Cobex_12_1_ET_fem	Cobex_12	15	ET	F	12	asex
Cobex_12_1_ET_fem	Cobex_12	15	ET	F	12	asex
Cobex_12_1_ET_fem	Cobex_12	18	ET	F	12	asex
Cobex_12_1_ET_fem	Cobex_12	16	ET	F	12	asex
Cobex_12_1_ET_fem	Cobex_12	16	ET	F	12	asex
Cobex_12_1_ET_fem	Cobex_12	13	ET	F	12	asex
Cobex_12_1_ET_fem	Cobex_12	14	ET	F	12	asex
Cobex_12_1_ET_fem	Cobex_12	12	ET	F	12	asex
Cobex_12_1_ET_fem	Cobex_12	17	ET	F	12	asex
Cobex_12_1_ET_fem	Cobex_12	17	ET	F	12	asex
Cobex_12_1_ET_fem	Cobex_12	16	ET	F	12	asex
Cobex_12_1_ET_fem	Cobex_12	15	ET	F	12	asex
Cobex_12_1_ET_fem	Cobex_12	12	ET	F	12	asex
Cobex_12_1_ET_fem	Cobex_12	11	ET	F	12	asex
Cobex_12_1_ET_fem	Cobex_12	15	ET	F	12	asex
Cobex_12_1_ET_fem	Cobex_12	16	ET	F	12	asex
Cobex_12_1_ET_fem	Cobex_12	14	ET	F	12	asex
7420_EN2xT_SCP1+3	2018ET	15	ET	F	12	asex
7420_EN2xT_SCP1+3	2018ET	16	ET	F	12	asex
7420_EN2xT_SCP1+3	2018ET	17	ET	F	12	asex
7420_EN2xT_SCP1+3	2018ET	16	ET	F	12	asex
7420_EN2xT_SCP1+3	2018ET	16	ET	F	12	asex
7420_EN2xT_SCP1+3	2018ET	12	ET	F	12	asex
7420_EN2xT_SCP1+3	2018ET	15	ET	F	12	asex
7420_EN2xT_SCP1+3	2018ET	18	ET	F	12	asex
7420_EN2xT_SCP1+3	2018ET	15	ET	F	12	asex
19321Alex46_1f_1scp1+3	Alex_46	11	ET	F	12	asex
19321Alex46_1f_1scp1+3	Alex_46	15	ET	F	12	asex
19321Alex46_1f_1scp1+3	Alex_46	17	ET	F	12	asex
19321Alex46_1f_1scp1+3	Alex_46	12	ET	F	12	asex
19321Alex46_1f_1scp1+3	Alex_46	14	ET	F	12	asex
19321Alex46_1f_1scp1+3	Alex_46	15	ET	F	12	asex
19321Alex46_1f_1scp1+3	Alex_46	14	ET	F	12	asex
19321Alex46_1f_1scp1+3	Alex_46	15	ET	F	12	asex
19321Alex46_1f_1scp1+3	Alex_46	14	ET	F	12	asex
19321Alex46_1f_1scp1+3	Alex_46	16	ET	F	12	asex
19321Alex46_1f_1scp1+3	Alex_46	13	ET	F	12	asex
19321Alex46_1f_1scp1+3	Alex_46	13	ET	F	12	asex
19321Alex46_1f_1scp1+3	Alex_46	49	ET	F	12	asex
19321Alex46_1f_1scp1+3	Alex_46	9	ET	F	12	asex
19321Alex46_1f_1scp1+3	Alex_46	20	ET	F	12	asex
19321Alex46_1f_1scp1+3	Alex_46	15	ET	F	12	asex
19321Alex46_1f_1scp1+3	Alex_46	13	ET	F	12	asex
19321Alex46_1f_1scp1+3	Alex_46	13	ET	F	12	asex
19321Alex46_1f_1scp1+3	Alex_46	15	ET	F	12	asex
19321Alex46_1f_1scp1+3	Alex_46	12	ET	F	12	asex
19321Alex46_1f_1scp1+3	Alex_46	13	ET	F	12	asex
19321Alex46_1f_1scp1+3	Alex_46	16	ET	F	12	asex
19321Alex46_1f_1scp1+3	Alex_46	15	ET	F	12	asex
19321Alex46_1f_2_scp3+mlh1	Alex_46	12	ET	F	12	asex
19321Alex46_1f_2_scp3+mlh1	Alex_46	11	ET	F	12	asex
19321Alex46_1f_2_scp3+mlh1	Alex_46	14	ET	F	12	asex
19321Alex46_1f_2_scp3+mlh1	Alex_46	15	ET	F	12	asex
19321Alex46_1f_2_scp3+mlh1	Alex_46	16	ET	F	12	asex
19321Alex46_1f_2_scp3+mlh1	Alex_46	15	ET	F	12	asex
19321Alex46_1f_2_scp3+mlh1	Alex_46	13	ET	F	12	asex
19321Alex46_1f_2_scp3+mlh1	Alex_46	11	ET	F	12	asex
19321Alex46_1f_2_scp3+mlh1	Alex_46	15	ET	F	12	asex
et1c7_210119_sycp1sycp3_slide1	2018ET	5	ET	M	12	sterile
et1c7_210119_sycp1sycp3_slide1	2018ET	5	ET	M	12	sterile
et1c7_210119_sycp1sycp3_slide1	2018ET	9	ET	M	12	sterile
et1c7_210119_sycp1sycp3_slide1	2018ET	6	ET	M	12	sterile
et1c7_210119_sycp1sycp3_slide1	2018ET	7	ET	M	12	sterile
et1c7_210119_sycp1sycp3_slide1	2018ET	8	ET	M	12	sterile
et1c7_210119_sycp1sycp3_slide1	2018ET	9	ET	M	12	sterile
et1c7_210119_sycp1sycp3_slide1	2018ET	7	ET	M	12	sterile
231119Alex65_1F	Alex_65	12	ET	F	12	asex
231119Alex65_1F	Alex_65	12	ET	F	12	asex
231119Alex65_1F	Alex_65	14	ET	F	12	asex
231119Alex65_1F	Alex_65	17	ET	F	12	asex
19321Alex65_1F_2_scp1+3	Alex_65	17	ET	F	12	asex
19321Alex65_1F_2_scp1+3	Alex_65	15	ET	F	12	asex
19321Alex65_1F_2_scp1+3	Alex_65	16	ET	F	12	asex
19321Alex65_1F_2_scp1+3	Alex_65	14	ET	F	12	asex
19321Alex65_1F_2_scp1+3	Alex_65	15	ET	F	12	asex
19321Alex65_1F_2_scp1+3	Alex_65	14	ET	F	12	asex
19321Alex65_1F_2_scp1+3	Alex_65	18	ET	F	12	asex
19321Alex65_1F_2_scp1+3	Alex_65	18	ET	F	12	asex
19321Alex65_1F_2_scp1+3	Alex_65	14	ET	F	12	asex
19321Alex65_1F_2_scp1+3	Alex_65	14	ET	F	12	asex
19321Alex65_1F_2_scp1+3	Alex_65	13	ET	F	12	asex
19321Alex65_1F_2_scp1+3	Alex_65	13	ET	F	12	asex
19321Alex65_1F_2_scp1+3	Alex_65	16	ET	F	12	asex
19321Alex65_1F_2_scp1+3	Alex_65	13	ET	F	12	asex
19321Alex65_1F_2_scp1+3	Alex_65	14	ET	F	12	asex
19321Alex65_1F_2_scp1+3	Alex_65	13	ET	F	12	asex
19321Alex65_1F_2_scp1+3	Alex_65	15	ET	F	12	asex
19321Alex65_1F_2_scp1+3	Alex_65	13	ET	F	12	asex
19321Alex65_1F_2_scp1+3	Alex_65	12	ET	F	12	asex
281130TB3M_1_MLH	2020TB	10	TB	M	5	sterile
TaurxE_1_sycp1_sycp3	Cobex_37	15	EC	F	4	asex
TaurxE_1_sycp1_sycp3	Cobex_37	17	EC	F	4	asex
TaurxE_1_sycp1_sycp3	Cobex_37	12	EC	F	4	asex
TaurxE_1_sycp1_sycp3	Cobex_37	11	EC	F	4	asex
TaurxE_1_sycp1_sycp3	Cobex_37	15	EC	F	4	asex
TaurxE_1_sycp1_sycp3	Cobex_37	12	EC	F	4	asex
TaurxE_1_sycp1_sycp3	Cobex_37	15	EC	F	4	asex
TaurxE_1_sycp1_sycp3	Cobex_37	16	EC	F	4	asex
TaurxE_1_sycp1_sycp3	Cobex_37	15	EC	F	4	asex
TaurxE_1_sycp1_sycp3	Cobex_37	14	EC	F	4	asex
TaurxE_1_sycp1_sycp3	Cobex_37	17	EC	F	4	asex
TaurxE_1_sycp1_sycp3	Cobex_37	50	EC	F	4	asex
Cobex37_1M	Cobex_37	20	EC	F	4	sterile
Cobex37_1M	Cobex_37	21	EC	F	4	sterile
Cobex37_1M	Cobex_37	15	EC	F	4	sterile
Cobex37_1M	Cobex_37	18	EC	F	4	sterile
Cobex37_1M	Cobex_37	16	EC	F	4	sterile
Cobex37_1M	Cobex_37	17	EC	F	4	sterile
Cobex37_1M	Cobex_37	18	EC	F	4	sterile
Cobex37_1M	Cobex_37	17	EC	F	4	sterile
Cobex37_1M	Cobex_37	18	EC	F	4	sterile
Cobex37_1M	Cobex_37	19	EC	F	4	sterile
Cobex37_1M	Cobex_37	14	EC	F	4	sterile
Cobex37_1M	Cobex_37	19	EC	F	4	sterile
Cobex37_1M	Cobex_37	16	EC	F	4	sterile
Cobex37_1M	Cobex_37	14	EC	F	4	sterile
Cobex37_1M	Cobex_37	20	EC	F	4	sterile
Cobex_37_4_cysp1_sysp3	Cobex_37	12	EC	F	4	sterile
Cobex_37_4_cysp1_sysp3	Cobex_37	15	EC	F	4	sterile
Cobex_37_4_cysp1_sysp3	Cobex_37	13	EC	F	4	sterile
Cobex_37_4_cysp1_sysp3	Cobex_37	21	EC	F	4	sterile
Cobex_37_4_cysp1_sysp3	Cobex_37	18	EC	F	4	sterile
Extaur_37_2scp1+3	Cobex_37	18	EC	M	4	sterile
Extaur_37_2scp1+3	Cobex_37	14	EC	M	4	sterile
Extaur_37_2scp1+3	Cobex_37	16	EC	M	4	sterile
Extaur_37_2scp1+3	Cobex_37	14	EC	M	4	sterile
Extaur_37_2scp1+3	Cobex_37	18	EC	M	4	sterile
Extaur_37_2scp1+3	Cobex_37	17	EC	M	4	sterile
Extaur_37_2scp1+3	Cobex_37	14	EC	M	4	sterile
Extaur_37_2scp1+3	Cobex_37	16	EC	M	4	sterile
Extaur_37_2scp1+3	Cobex_37	17	EC	M	4	sterile
Extaur_37_2scp1+3	Cobex_37	14	EC	M	4	sterile
Extaur_37_2scp1+3	Cobex_37	18	EC	M	4	sterile
Extaur_37_2scp1+3	Cobex_37	16	EC	M	4	sterile
Extaur_37_2scp1+3	Cobex_37	17	EC	M	4	sterile
Extaur_37_2scp1+3	Cobex_37	17	EC	M	4	sterile
Extaur_37_2scp1+3	Cobex_37	15	EC	M	4	sterile
11420alex_47_1_2	Alex_47	18	EN	F	4	asex
11420alex_47_1_2	Alex_47	11	EN	F	4	asex
11420alex_47_1_2	Alex_47	18	EN	F	4	asex
11420alex_47_1_2	Alex_47	15	EN	F	4	asex
Alex47_2F	Alex_47	16	EN	F	4	asex
Alex47_2F	Alex_47	16	EN	F	4	asex
Alex47_2F	Alex_47	18	EN	F	4	asex
Alex47_2F	Alex_47	18	EN	F	4	asex
Alex47_2F	Alex_47	15	EN	F	4	asex
Alex47_2F	Alex_47	20	EN	F	4	asex
Alex47_2F	Alex_47	16	EN	F	4	asex
Alex47_2F	Alex_47	15	EN	F	4	asex
Alex47_2F	Alex_47	15	EN	F	4	asex
Alex47_2F	Alex_47	16	EN	F	4	asex
Alex47_2F	Alex_47	15	EN	F	4	asex
Alex47_2F	Alex_47	17	EN	F	4	asex
Alex47_2F	Alex_47	18	EN	F	4	asex
Alex47_2F	Alex_47	17	EN	F	4	asex
Alex47_2F	Alex_47	12	EN	F	4	asex
Alex47_2F	Alex_47	15	EN	F	4	asex
Alex47_2F	Alex_47	19	EN	F	4	asex
231119_Alex47_2F	Alex_47	17	EN	F	4	asex
231119_Alex47_2F	Alex_47	14	EN	F	4	asex
231119_Alex47_2F	Alex_47	17	EN	F	4	asex
231119_Alex47_2F	Alex_47	16	EN	F	4	asex
231119_Alex47_2F	Alex_47	15	EN	F	4	asex
231119_Alex47_2F	Alex_47	20	EN	F	4	asex
231119_Alex47_2F	Alex_47	19	EN	F	4	asex
19321AF13_2F__scp1+3	2020AF_13	18	EN	F	4	asex
19321AF13_2F__scp1+3	2020AF_13	17	EN	F	4	asex
19321AF13_2F__scp1+3	2020AF_13	15	EN	F	4	asex
19321AF13_2F__scp1+3	2020AF_13	12	EN	F	4	asex
19321AF13_2F__scp1+3	2020AF_13	15	EN	F	4	asex
19321AF13_2F__scp1+3	2020AF_13	19	EN	F	4	asex
19321AF13_2F__scp1+3	2020AF_13	20	EN	F	4	asex
19321AF13_2F__scp1+3	2020AF_13	13	EN	F	4	asex
19321AF13_2F__scp1+3	2020AF_13	16	EN	F	4	asex
19321AF13_2F__scp1+3	2020AF_13	12	EN	F	4	asex
19321AF13_2F__scp1+3	2020AF_13	15	EN	F	4	asex
19321AF13_2F__scp1+3	2020AF_13	18	EN	F	4	asex
19321AF13_2F__scp3+mlh1	2020AF_13	18	EN	F	4	asex
19321AF13_2F__scp3+mlh1	2020AF_13	19	EN	F	4	asex
19321AF13_2F__scp3+mlh1	2020AF_13	17	EN	F	4	asex
19321AF13_2F__scp3+mlh1	2020AF_13	17	EN	F	4	asex
19321AF13_2F__scp3+mlh1	2020AF_13	13	EN	F	4	asex
19321AF13_2F__scp3+mlh1	2020AF_13	20	EN	F	4	asex
19321AF13_2F__scp3+mlh1	2020AF_13	18	EN	F	4	asex
19321AF13_2F__scp3+mlh1	2020AF_13	20	EN	F	4	asex
8920NF6F3_2_scp3+mlh	2020TB	15	TB	F	5	NA
8920NF6F3_2_scp3+mlh	2020TB	12	TB	F	5	NA
8920NF6F3_2_scp3+mlh	2020TB	15	TB	F	5	NA
8920NF6F3_2_scp3+mlh	2020TB	17	TB	F	5	NA
8920NF6F3_2_scp3+mlh	2020TB	11	TB	F	5	NA
8920NF6F3_2_scp3+mlh	2020TB	15	TB	F	5	NA
8920NF6F3_2_scp3+mlh	2020TB	15	TB	F	5	NA
8920NF6F3_2_scp3+mlh	2020TB	16	TB	F	5	NA
8920NF6F3_2_scp3+mlh	2020TB	11	TB	F	5	NA
8920NF6F3_2_scp3+mlh	2020TB	20	TB	F	5	NA
8920NF6F3_2_scp3+mlh	2020TB	10	TB	F	5	NA
8920NF6F3_2_scp3+mlh	2020TB	18	TB	F	5	NA
8920NF6F3_2_scp3+mlh	2020TB	16	TB	F	5	NA
8920NF6F3_2_scp3+mlh	2020TB	16	TB	F	5	NA
8920NF6F3_2_scp3+mlh	2020TB	17	TB	F	5	NA
8920NF6F3_2_scp3+mlh	2020TB	15	TB	F	5	NA
8920NF6F3_2_scp3+mlh	2020TB	15	TB	F	5	NA
25321TE1M_1_scp3+mlh	Alex_65	9	ET	M	12	sterile
25321TE1M_1_scp3+mlh	Alex_65	9	ET	M	12	sterile
25321TE1M_1_scp3+mlh	Alex_65	9	ET	M	12	sterile
25321TE1M_1_scp3+mlh	Alex_65	11	ET	M	12	sterile
25321TE1M_1_scp3+mlh	Alex_65	12	ET	M	12	sterile
25321TE1M_1_scp3+mlh	Alex_65	11	ET	M	12	sterile
25321TE1M_1_scp3+mlh	Alex_65	12	ET	M	12	sterile
25321TE1M_1_scp3+mlh	Alex_65	9	ET	M	12	sterile
25321TE1M_1_scp3+mlh	Alex_65	8	ET	M	12	sterile
25321TE1M_1_scp3+mlh	Alex_65	10	ET	M	12	sterile
25321TE2M_1_scp3+mlh	Alex_65	10	ET	M	12	sterile
25321TE2M_1_scp3+mlh	Alex_65	12	ET	M	12	sterile
25321TE2M_1_scp3+mlh	Alex_65	11	ET	M	12	sterile
25321TE2M_1_scp3+mlh	Alex_65	12	ET	M	12	sterile
25321TE2M_1_scp3+mlh	Alex_65	10	ET	M	12	sterile
25321TE2M_1_scp3+mlh	Alex_65	11	ET	M	12	sterile
25321TE2M_1_scp3+mlh	Alex_65	12	ET	M	12	sterile
25321TE2M_1_scp3+mlh	Alex_65	7	ET	M	12	sterile
35OE_m2	Alex_45	14	EO	M	14	sterile
35OE_m2	Alex_45	12	EO	M	14	sterile
35OE_m2	Alex_45	14	EO	M	14	sterile
35OE_m2	Alex_45	12	EO	M	14	sterile
35OE_m2	Alex_45	8	EO	M	14	sterile
35OE_m2	Alex_45	12	EO	M	14	sterile
35OE_m2	Alex_45	13	EO	M	14	sterile
35OE_m2	Alex_45	10	EO	M	14	sterile
35OE_m2	Alex_45	13	EO	M	14	sterile
35OE_m2	Alex_45	10	EO	M	14	sterile
35OE_m2	Alex_45	13	EO	M	14	sterile
35OE_m2	Alex_45	12	EO	M	14	sterile
35OE_m2	Alex_45	9	EO	M	14	sterile
35OE_m2	Alex_45	13	EO	M	14	sterile
35OE_m2	Alex_45	10	EO	M	14	sterile
35OE_m2	Alex_45	12	EO	M	14	sterile
35OE_m2	Alex_45	11	EO	M	14	sterile
35OE_m2	Alex_45	8	EO	M	14	sterile
35OE_m2	Alex_45	12	EO	M	14	sterile
35OE_m2	Alex_45	13	EO	M	14	sterile
35OE_m2	Alex_45	12	EO	M	14	sterile
35OE_m2	Alex_45	10	EO	M	14	sterile
35OE_m2	Alex_45	15	EO	M	14	sterile
35OE_m2	Alex_45	9	EO	M	14	sterile
35OE_m2	Alex_45	15	EO	M	14	sterile
35OE_m2	Alex_45	9	EO	M	14	sterile
35OE_m2	Alex_45	8	EO	M	14	sterile
35OE_m2	Alex_45	13	EO	M	14	sterile
20821ES1F_2_SCP3	2017ES	12	ES	F	14	asex
20821ES1F_2_SCP3	2017ES	11	ES	F	14	asex
20821ES1F_2_SCP3	2017ES	12	ES	F	14	asex
20821ES1F_2_SCP3	2017ES	5	ES	F	14	asex
20821ES1F_2_SCP3	2017ES	15	ES	F	14	asex
20821ES1F_2_SCP3	2017ES	6	ES	F	14	asex
20821ES1F_2_SCP3	2017ES	12	ES	F	14	asex
20821ES1F_2_SCP3	2017ES	9	ES	F	14	asex
20821ES1F_2_SCP3	2017ES	13	ES	F	14	asex
20821ES1F_2_SCP3	2017ES	6	ES	F	14	asex
20821ES1F_2_SCP3	2017ES	10	ES	F	14	asex
20821ES1F_2_SCP3	2017ES	10	ES	F	14	asex
20821ES1F_2_SCP3	2017ES	7	ES	F	14	asex
20821ES1F_2_SCP3	2017ES	10	ES	F	14	asex
20821ES1F_2_SCP3	2017ES	7	ES	F	14	asex
20821ES1F_2_SCP3	2017ES	11	ES	F	14	asex
20821ES1F_2_SCP3	2017ES	7	ES	F	14	asex
20821ES1F_2_SCP3	2017ES	8	ES	F	14	asex
20821ES1F_2_SCP3	2017ES	9	ES	F	14	asex
20821ES1F_2_SCP3	2017ES	10	ES	F	14	asex
20821ES1F_2_SCP3	2017ES	12	ES	F	14	asex
19821ES1F_1_SCP3	2017ES	9	ES	F	14	asex
19821ES1F_1_SCP3	2017ES	11	ES	F	14	asex
19821ES1F_1_SCP3	2017ES	13	ES	F	14	asex
19821ES1F_1_SCP3	2017ES	8	ES	F	14	asex
19821ES1F_1_SCP3	2017ES	9	ES	F	14	asex
19821ES1F_1_SCP3	2017ES	12	ES	F	14	asex
19821ES1F_1_SCP3	2017ES	7	ES	F	14	asex
19821ES1F_1_SCP3	2017ES	8	ES	F	14	asex
19821ES1F_1_SCP3	2017ES	6	ES	F	14	asex
20821Alex47_1M_2_scp3	Alex_47	7	EN	M	4	sterile
20821Alex47_1M_2_scp3	Alex_47	9	EN	M	4	sterile
20821Alex47_1M_2_scp3	Alex_47	9	EN	M	4	sterile
20821Alex47_1M_2_scp3	Alex_47	13	EN	M	4	sterile
20821Alex47_1M_2_scp3	Alex_47	9	EN	M	4	sterile
20821Alex47_1M_2_scp3	Alex_47	10	EN	M	4	sterile
20821Alex47_1M_2_scp3	Alex_47	15	EN	M	4	sterile
20821Alex47_1M_2_scp3	Alex_47	8	EN	M	4	sterile
20821Alex47_1M_2_scp3	Alex_47	11	EN	M	4	sterile
20821Alex47_1M_2_scp3	Alex_47	16	EN	M	4	sterile
20821Alex47_1M_2_scp3	Alex_47	15	EN	M	4	sterile
19821ES4_1F_1_scp3	2017ES	7	ES	F	14	asex
19821ES4_1F_1_scp3	2017ES	5	ES	F	14	asex
19821ES4_1F_1_scp3	2017ES	10	ES	F	14	asex
19821ES4_1F_1_scp3	2017ES	5	ES	F	14	asex
19821ES4_1F_1_scp3	2017ES	9	ES	F	14	asex
19821ES4_1F_1_scp3	2017ES	9	ES	F	14	asex
19821ES4_1F_1_scp3	2017ES	9	ES	F	14	asex
19821ES4_1F_1_scp3	2017ES	8	ES	F	14	asex
19821ES4_1F_1_scp3	2017ES	10	ES	F	14	asex
19821ES4_1F_1_scp3	2017ES	10	ES	F	14	asex
19821ES4_1F_1_scp3	2017ES	6	ES	F	14	asex
19821ES4_1F_1_scp3	2017ES	7	ES	F	14	asex
19821ES4_1F_1_scp3	2017ES	7	ES	F	14	asex
19821ES4_1F_1_scp3	2017ES	10	ES	F	14	asex
OB_39_2	Cobex_29	5	OB	M	1	sterile
OB_39_2	Cobex_29	10	OB	M	1	sterile
OB_39_2	Cobex_29	12	OB	M	1	sterile
OB_39_2	Cobex_29	10	OB	M	1	sterile
OB_39_2	Cobex_29	14	OB	M	1	sterile
OB_39_2	Cobex_29	5	OB	M	1	sterile
OB_39_2	Cobex_29	9	OB	M	1	sterile
OB_39_2	Cobex_29	7	OB	M	1	sterile
OB_39_2	Cobex_29	11	OB	M	1	sterile
OB_39_2	Cobex_29	12	OB	M	1	sterile
OB_39_2	Cobex_29	10	OB	M	1	sterile
OB_39_2	Cobex_29	12	OB	M	1	sterile
OB_39_2	Cobex_29	15	OB	M	1	sterile
OB_39_2	Cobex_29	15	OB	M	1	sterile
OB_39_2	Cobex_29	13	OB	M	1	sterile
OB_39_2	Cobex_29	15	OB	M	1	sterile
OB_39_2	Cobex_29	8	OB	M	1	sterile
OB_39_2	Cobex_29	13	OB	M	1	sterile
OB_39_2	Cobex_29	17	OB	M	1	sterile
OB_39_2	Cobex_29	9	OB	M	1	sterile
OB_39_2	Cobex_29	8	OB	M	1	sterile
OB_39_2	Cobex_29	13	OB	M	1	sterile
OB_39_2	Cobex_29	11	OB	M	1	sterile
OB_39_2	Cobex_29	12	OB	M	1	sterile
OB_39_2	Cobex_29	8	OB	M	1	sterile
OB_39_2	Cobex_29	14	OB	M	1	sterile
OB_39_2	Cobex_29	17	OB	M	1	sterile
OB_39_2	Cobex_29	18	OB	M	1	sterile
OB_39_2	Cobex_29	14	OB	M	1	sterile
OB_39_2	Cobex_29	13	OB	M	1	sterile
OB_39_2	Cobex_29	13	OB	M	1	sterile
OB_39_2	Cobex_29	11	OB	M	1	sterile
OB_39_2	Cobex_29	10	OB	M	1	sterile
20821Alex47_1M_1_scp1+3	Alex_47	14	EN	M	4	sterile
20821Alex47_1M_1_scp1+3	Alex_47	14	EN	M	4	sterile
20821Alex47_1M_1_scp1+3	Alex_47	14	EN	M	4	sterile
20821Alex47_1M_1_scp1+3	Alex_47	14	EN	M	4	sterile
20821Alex47_1M_1_scp1+3	Alex_47	14	EN	M	4	sterile
20821Alex47_1M_1_scp1+3	Alex_47	13	EN	M	4	sterile
20821Alex47_1M_1_scp1+3	Alex_47	10	EN	M	4	sterile
20821Alex47_1M_1_scp1+3	Alex_47	12	EN	M	4	sterile
20821Alex47_1M_1_scp1+3	Alex_47	15	EN	M	4	sterile
20821Alex47_1M_1_scp1+3	Alex_47	11	EN	M	4	sterile
20821Alex47_1M_1_scp1+3	Alex_47	13	EN	M	4	sterile
20821Alex47_1M_1_scp1+3	Alex_47	20	EN	M	4	sterile
20821Alex47_1M_1_scp1+3	Alex_47	13	EN	M	4	sterile
20821Alex47_1M_1_scp1+3	Alex_47	15	EN	M	4	sterile
20821Alex47_1M_1_scp1+3	Alex_47	15	EN	M	4	sterile
20821Alex47_1M_1_scp1+3	Alex_47	15	EN	M	4	sterile
20821Alex47_1M_1_scp1+3	Alex_47	14	EN	M	4	sterile
20821Alex47_1M_1_scp1+3	Alex_47	14	EN	M	4	sterile
20821Alex47_1M_1_scp1+3	Alex_47	17	EN	M	4	sterile
20821Alex47_1M_1_scp1+3	Alex_47	16	EN	M	4	sterile
20821Alex47_1M_1_scp1+3	Alex_47	18	EN	M	4	sterile
20821Alex47_1M_1_scp1+3	Alex_47	16	EN	M	4	sterile
20821Alex47_1M_1_scp1+3	Alex_47	13	EN	M	4	sterile
20821Alex47_1M_1_scp1+3	Alex_47	15	EN	M	4	sterile
20821Alex47_1M_1_scp1+3	Alex_47	15	EN	M	4	sterile
20821Alex47_1M_1_scp1+3	Alex_47	16	EN	M	4	sterile
20821Alex47_1M_1_scp1+3	Alex_47	18	EN	M	4	sterile
20821Alex47_1M_1_scp1+3	Alex_47	18	EN	M	4	sterile
20821Alex47_1M_1_scp1+3	Alex_47	15	EN	M	4	sterile
20821Alex47_1M_1_scp1+3	Alex_47	13	EN	M	4	sterile
20821Alex47_1M_1_scp1+3	Alex_47	15	EN	M	4	sterile
20821ES_scp1+3	2017ES	9	ES	F	14	asex
20821ES_scp1+3	2017ES	9	ES	F	14	asex
20821ES_scp1+3	2017ES	8	ES	F	14	asex
20821ES_scp1+3	2017ES	13	ES	F	14	asex
20821ES_scp1+3	2017ES	11	ES	F	14	asex
20821ES_scp1+3	2017ES	10	ES	F	14	asex
20821ES_scp1+3	2017ES	9	ES	F	14	asex
20821ES_scp1+3	2017ES	11	ES	F	14	asex
20821ES_scp1+3	2017ES	11	ES	F	14	asex
20821ES_scp1+3	2017ES	10	ES	F	14	asex
20821ES_scp1+3	2017ES	11	ES	F	14	asex
20821ES_scp1+3	2017ES	9	ES	F	14	asex
20821ES_scp1+3	2017ES	8	ES	F	14	asex
20821ES_scp1+3	2017ES	9	ES	F	14	asex
20821ES_scp1+3	2017ES	9	ES	F	14	asex
20821ES_scp1+3	2017ES	9	ES	F	14	asex
20821ES_scp1+3	2017ES	11	ES	F	14	asex
20821ES_scp1+3	2017ES	10	ES	F	14	asex
20821ES_scp1+3	2017ES	9	ES	F	14	asex
20821ES_scp1+3	2017ES	9	ES	F	14	asex
20821ES_scp1+3	2017ES	10	ES	F	14	asex
20821ES_scp1+3	2017ES	12	ES	F	14	asex
20821ES_scp1+3	2017ES	6	ES	F	14	asex
20821ES_scp1+3	2017ES	9	ES	F	14	asex
20821ES_scp1+3	2017ES	9	ES	F	14	asex
20821ES_scp1+3	2017ES	12	ES	F	14	asex
20821ES_scp1+3	2017ES	8	ES	F	14	asex
20821ES_scp1+3	2017ES	11	ES	F	14	asex
20821ES_scp1+3	2017ES	11	ES	F	14	asex
20821ES_scp1+3	2017ES	7	ES	F	14	asex
20821ES_scp1+3	2017ES	11	ES	F	14	asex
20821ES_scp1+3	2017ES	16	ES	F	14	asex
20821ES_scp1+3	2017ES	9	ES	F	14	asex
20821ES_scp1+3	2017ES	12	ES	F	14	asex
20821ES_scp1+3	2017ES	14	ES	F	14	asex
20821ES_scp1+3	2017ES	11	ES	F	14	asex
20821ES_scp1+3	2017ES	12	ES	F	14	asex
20821ES_scp1+3	2017ES	12	ES	F	14	asex
20821ES_scp1+3	2017ES	13	ES	F	14	asex
20821ES_scp1+3	2017ES	9	ES	F	14	asex
20821ES_scp1+3	2017ES	9	ES	F	14	asex
20821ES_scp1+3	2017ES	11	ES	F	14	asex
20821ES_scp1+3	2017ES	12	ES	F	14	asex
20821ES_scp1+3	2017ES	11	ES	F	14	asex
20821ES_scp1+3	2017ES	10	ES	F	14	asex
20821ES_scp1+3	2017ES	17	ES	F	14	asex
20821ES_scp1+3	2017ES	12	ES	F	14	asex
20821ES_scp1+3	2017ES	11	ES	F	14	asex
20821ES_scp1+3	2017ES	8	ES	F	14	asex
19821ES3M_1_scp1+3	2017ES	8	ES	M	14	sterile
19821ES3M_1_scp1+3	2017ES	6	ES	M	14	sterile
19821ES3M_1_scp1+3	2017ES	6	ES	M	14	sterile
19821ES3M_1_scp1+3	2017ES	7	ES	M	14	sterile
19821ES3M_1_scp1+3	2017ES	7	ES	M	14	sterile
19821ES3M_1_scp1+3	2017ES	7	ES	M	14	sterile
19821ES3M_1_scp1+3	2017ES	8	ES	M	14	sterile
19821ES3M_1_scp1+3	2017ES	7	ES	M	14	sterile
19821ES3M_1_scp1+3	2017ES	8	ES	M	14	sterile
19821ES3M_1_scp1+3	2017ES	8	ES	M	14	sterile
19821ES3M_1_scp1+3	2017ES	9	ES	M	14	sterile
19821ES3M_1_scp1+3	2017ES	5	ES	M	14	sterile
19821ES3M_1_scp1+3	2017ES	8	ES	M	14	sterile
19821ES3M_1_scp1+3	2017ES	9	ES	M	14	sterile
19821ES3M_1_scp1+3	2017ES	5	ES	M	14	sterile
19821ES3M_1_scp1+3	2017ES	5	ES	M	14	sterile
19821ES1F_1_SCP1+3	2017ES	6	ES	F	14	asex
19821ES1F_1_SCP1+3	2017ES	5	ES	F	14	asex
19821ES1F_1_SCP1+3	2017ES	15	ES	F	14	asex
19821ES1F_1_SCP1+3	2017ES	5	ES	F	14	asex
19821ES1F_1_SCP1+3	2017ES	50	ES	F	14	asex
19821ES1F_1_SCP1+3	2017ES	7	ES	F	14	asex
19821ES1F_1_SCP1+3	2017ES	8	ES	F	14	asex
19821ES1F_1_SCP1+3	2017ES	8	ES	F	14	asex
19821ES1F_1_SCP1+3	2017ES	50	ES	F	14	asex
24222NP_1F_1SCP1+3	2021NP	21	NP	F	0	sexual
24222NP_1F_1SCP1+3	2021NP	23	NP	F	0	sexual
24222NP_1F_1SCP1+3	2021NP	24	NP	F	0	sexual
24222NP_1F_1SCP1+3	2021NP	23	NP	F	0	sexual
24222NP_1F_1SCP1+3	2021NP	23	NP	F	0	sexual
24222NP_1F_1SCP1+3	2021NP	23	NP	F	0	sexual
24222NP_1F_1SCP1+3	2021NP	24	NP	F	0	sexual
24222NP_1F_1SCP1+3	2021NP	23	NP	F	0	sexual
24222NP_1F_1SCP1+3	2021NP	24	NP	F	0	sexual
24222NP_1F_1SCP1+3	2021NP	24	NP	F	0	sexual
24222NP_1F_1SCP1+3	2021NP	23	NP	F	0	sexual
24222NP_1F_1SCP1+3	2021NP	25	NP	F	0	sexual
24222NP_1F_1SCP1+3	2021NP	23	NP	F	0	sexual
24222NP_1F_1SCP1+3	2021NP	23	NP	F	0	sexual
24222NP_1F_1SCP1+3	2021NP	23	NP	F	0	sexual
24222NP_1F_1SCP1+3	2021NP	25	NP	F	0	sexual
24222NP_1F_1SCP1+3	2021NP	25	NP	F	0	sexual
24222NP_1F_1SCP1+3	2021NP	25	NP	F	0	sexual
24222NP_1F_1SCP1+3	2021NP	25	NP	F	0	sexual
24222NP_1F_1SCP1+3	2021NP	23	NP	F	0	sexual
24222NP_1F_1SCP1+3	2021NP	24	NP	F	0	sexual
24222NP_1F_1SCP1+3	2021NP	24	NP	F	0	sexual
24222NP_1F_1SCP1+3	2021NP	24	NP	F	0	sexual
24222NP_1F_1SCP1+3	2021NP	25	NP	F	0	sexual
24222NP_1F_1SCP1+3	2021NP	23	NP	F	0	sexual
24222NP_1F_1SCP1+3	2021NP	23	NP	F	0	sexual
24222NP_1F_1SCP1+3	2021NP	25	NP	F	0	sexual
24222NP_1F_1SCP1+3	2021NP	24	NP	F	0	sexual
24222NP_1F_1SCP1+3	2021NP	25	NP	F	0	sexual
24222NP_1F_1SCP1+3	2021NP	24	NP	F	0	sexual
24222NP_1F_1SCP1+3	2021NP	25	NP	F	0	sexual
24222NP_1F_1SCP1+3	2021NP	23	NP	F	0	sexual
24222NP_1F_1SCP1+3	2021NP	23	NP	F	0	sexual
24222NP_1F_1SCP1+3	2021NP	23	NP	F	0	sexual
24222NP_1F_1SCP1+3	2021NP	24	NP	F	0	sexual
24222NP_1F_1SCP1+3	2021NP	23	NP	F	0	sexual
24222NP_1F_1SCP1+3	2021NP	25	NP	F	0	sexual
24222NP_1F_1SCP1+3	2021NP	24	NP	F	0	sexual
24222NP_1F_1SCP1+3	2021NP	25	NP	F	0	sexual
24222NP_1F_1SCP1+3	2021NP	24	NP	F	0	sexual
24222NP_1F_1SCP1+3	2021NP	24	NP	F	0	sexual
24222NP_1F_1SCP1+3	2021NP	24	NP	F	0	sexual
24222NP_1F_1SCP1+3	2021NP	25	NP	F	0	sexual
24222NP_1F_1SCP1+3	2021NP	25	NP	F	0	sexual
24222NP_1F_1SCP1+3	2021NP	24	NP	F	0	sexual
24222NP_1F_1SCP1+3	2021NP	24	NP	F	0	sexual
24222NP_1F_1SCP1+3	2021NP	24	NP	F	0	sexual
24222NP_1F_1SCP1+3	2021NP	22	NP	F	0	sexual
24222NP_1F_1SCP1+3	2021NP	23	NP	F	0	sexual
24222NP_1F_1SCP1+3	2021NP	23	NP	F	0	sexual
24222NP_3F_1SCP1+3	2021NP	24	NP	F	0	sexual
24222NP_3F_1SCP1+3	2021NP	25	NP	F	0	sexual
24222NP_3F_1SCP1+3	2021NP	25	NP	F	0	sexual
24222NP_3F_1SCP1+3	2021NP	24	NP	F	0	sexual
24222NP_3F_1SCP1+3	2021NP	24	NP	F	0	sexual
24222NP_3F_1SCP1+3	2021NP	23	NP	F	0	sexual
24222NP_3F_1SCP1+3	2021NP	23	NP	F	0	sexual
24222NP_3F_1SCP1+3	2021NP	24	NP	F	0	sexual
24222NP_3F_1SCP1+3	2021NP	25	NP	F	0	sexual
24222NP_3F_1SCP1+3	2021NP	24	NP	F	0	sexual
24222NP_3F_1SCP1+3	2021NP	25	NP	F	0	sexual
24222NP_3F_1SCP1+3	2021NP	24	NP	F	0	sexual
24222NP_3F_1SCP1+3	2021NP	23	NP	F	0	sexual
24222NP_3F_1SCP1+3	2021NP	25	NP	F	0	sexual
24222NP_6M_1SCP1+3	2021NP	23	NP	M	0	sexual
24222NP_6M_1SCP1+3	2021NP	25	NP	M	0	sexual
24222NP_6M_1SCP1+3	2021NP	23	NP	M	0	sexual
24222NP_6M_1SCP1+3	2021NP	23	NP	M	0	sexual
24222NP_6M_1SCP1+3	2021NP	25	NP	M	0	sexual
24222NP_6M_1SCP1+3	2021NP	23	NP	M	0	sexual
24222NP_6M_1SCP1+3	2021NP	25	NP	M	0	sexual
24222NP_6M_1SCP1+3	2021NP	25	NP	M	0	sexual
24222NP_6M_1SCP1+3	2021NP	24	NP	M	0	sexual
24222NP_6M_1SCP1+3	2021NP	25	NP	M	0	sexual
24222NP_6M_1SCP1+3	2021NP	24	NP	M	0	sexual
24222NP_6M_1SCP1+3	2021NP	24	NP	M	0	sexual
24222NP_6M_1SCP1+3	2021NP	25	NP	M	0	sexual
24222NP_6M_1SCP1+3	2021NP	25	NP	M	0	sexual
24222NP_6M_1SCP1+3	2021NP	25	NP	M	0	sexual
24222NP_6M_1SCP1+3	2021NP	25	NP	M	0	sexual
24222NP_6M_1SCP1+3	2021NP	24	NP	M	0	sexual
24222NP_6M_1SCP1+3	2021NP	25	NP	M	0	sexual
24222NP_6M_1SCP1+3	2021NP	25	NP	M	0	sexual
24222NP_6M_1SCP1+3	2021NP	24	NP	M	0	sexual
24222NP_6M_1SCP1+3	2021NP	25	NP	M	0	sexual
24222NP_6M_1SCP1+3	2021NP	25	NP	M	0	sexual
24222NP_6M_1SCP1+3	2021NP	25	NP	M	0	sexual
24222NP_6M_1SCP1+3	2021NP	25	NP	M	0	sexual
24222NP_6M_1SCP1+3	2021NP	25	NP	M	0	sexual
24222NP_6M_1SCP1+3	2021NP	25	NP	M	0	sexual
24222NP_6M_1SCP1+3	2021NP	25	NP	M	0	sexual
24222NP_6M_1SCP1+3	2021NP	24	NP	M	0	sexual
24222NP_6M_1SCP1+3	2021NP	25	NP	M	0	sexual
24222NP_6M_1SCP1+3	2021NP	25	NP	M	0	sexual
24222NP_6M_1SCP1+3	2021NP	25	NP	M	0	sexual
24222NP_6M_1SCP1+3	2021NP	25	NP	M	0	sexual
24222NP_6M_1SCP1+3	2021NP	25	NP	M	0	sexual
24222NP_6M_1SCP1+3	2021NP	25	NP	M	0	sexual
24222NP_6M_1SCP1+3	2021NP	25	NP	M	0	sexual
24222NP_6M_1SCP1+3	2021NP	25	NP	M	0	sexual
EE1	NA	25	EE	F	0	sexual
EE1	NA	25	EE	F	0	sexual
EE1	NA	25	EE	F	0	sexual
EE1	NA	25	EE	F	0	sexual
EE1	NA	25	EE	F	0	sexual
EE1	NA	25	EE	F	0	sexual
EE1	NA	25	EE	F	0	sexual
EE1	NA	25	EE	F	0	sexual
EE1	NA	25	EE	F	0	sexual
EE1	NA	25	EE	F	0	sexual
EE1	NA	25	EE	F	0	sexual
EE1	NA	25	EE	F	0	sexual
EE1	NA	25	EE	F	0	sexual
EE1	NA	25	EE	F	0	sexual
EE1	NA	25	EE	F	0	sexual
EE1	NA	25	EE	F	0	sexual
EE1	NA	25	EE	F	0	sexual
EE1	NA	25	EE	F	0	sexual
EE1	NA	25	EE	F	0	sexual
EE1	NA	25	EE	F	0	sexual
EE1	NA	25	EE	F	0	sexual
EE1	NA	25	EE	F	0	sexual
EE1	NA	25	EE	F	0	sexual
EE1	NA	25	EE	F	0	sexual
EE1	NA	25	EE	F	0	sexual
EE1	NA	25	EE	F	0	sexual
EE1	NA	25	EE	F	0	sexual
EE1	NA	25	EE	F	0	sexual
EE1	NA	25	EE	F	0	sexual
EE1	NA	25	EE	F	0	sexual
EE1	NA	25	EE	F	0	sexual
EE1	NA	25	EE	F	0	sexual
EE1	NA	25	EE	F	0	sexual
EE1	NA	25	EE	F	0	sexual
EE1	NA	25	EE	F	0	sexual
EE1	NA	25	EE	F	0	sexual
EE1	NA	25	EE	F	0	sexual
EE1	NA	25	EE	F	0	sexual
EE1	NA	25	EE	F	0	sexual
EE1	NA	25	EE	F	0	sexual
EE2	NA	25	EE	F	0	sexual
EE2	NA	25	EE	F	0	sexual
EE2	NA	25	EE	F	0	sexual
EE2	NA	25	EE	F	0	sexual
EE2	NA	25	EE	F	0	sexual
EE2	NA	25	EE	F	0	sexual
EE2	NA	25	EE	F	0	sexual
EE2	NA	25	EE	F	0	sexual
EE2	NA	25	EE	F	0	sexual
EE2	NA	25	EE	F	0	sexual
EE2	NA	25	EE	F	0	sexual
EE2	NA	25	EE	F	0	sexual
EE2	NA	25	EE	F	0	sexual
EE2	NA	25	EE	F	0	sexual
EE2	NA	25	EE	F	0	sexual
EE2	NA	25	EE	F	0	sexual
EE2	NA	25	EE	F	0	sexual
EE2	NA	25	EE	F	0	sexual
EE2	NA	25	EE	F	0	sexual
EE2	NA	25	EE	F	0	sexual
EE2	NA	25	EE	F	0	sexual
EE2	NA	25	EE	F	0	sexual
EE2	NA	25	EE	F	0	sexual
EE2	NA	25	EE	F	0	sexual
EE2	NA	25	EE	F	0	sexual
EE2	NA	25	EE	F	0	sexual
EE2	NA	25	EE	F	0	sexual
EE2	NA	25	EE	F	0	sexual
EE2	NA	25	EE	F	0	sexual
EE2	NA	25	EE	F	0	sexual
EE2	NA	25	EE	F	0	sexual
EE2	NA	25	EE	F	0	sexual
EE2	NA	25	EE	F	0	sexual
EE2	NA	25	EE	F	0	sexual
EE2	NA	25	EE	F	0	sexual
EE2	NA	25	EE	F	0	sexual
EE2	NA	25	EE	F	0	sexual
EE2	NA	25	EE	F	0	sexual
EE2	NA	25	EE	F	0	sexual
EE2	NA	25	EE	F	0	sexual
EE2	NA	25	EE	F	0	sexual
EE2	NA	25	EE	F	0	sexual
EE2	NA	25	EE	F	0	sexual
EE2	NA	25	EE	F	0	sexual
EE2	NA	25	EE	F	0	sexual
EE2	NA	25	EE	F	0	sexual
EE3	NA	25	EE	F	0	sexual
EE3	NA	25	EE	F	0	sexual
EE3	NA	25	EE	F	0	sexual
EE3	NA	25	EE	F	0	sexual
EE3	NA	25	EE	F	0	sexual
EE3	NA	25	EE	F	0	sexual
EE3	NA	25	EE	F	0	sexual
EE3	NA	25	EE	F	0	sexual
EE3	NA	25	EE	F	0	sexual
EE3	NA	25	EE	F	0	sexual
EE3	NA	25	EE	F	0	sexual
EE3	NA	25	EE	F	0	sexual
EE3	NA	25	EE	F	0	sexual
EE3	NA	25	EE	F	0	sexual
EE3	NA	25	EE	F	0	sexual
EE3	NA	25	EE	F	0	sexual
EE3	NA	25	EE	F	0	sexual
EE3	NA	25	EE	F	0	sexual
EE3	NA	25	EE	F	0	sexual
EE3	NA	25	EE	F	0	sexual
EE4	NA	25	EE	F	0	sexual
EE4	NA	25	EE	F	0	sexual
EE4	NA	25	EE	F	0	sexual
EE4	NA	25	EE	F	0	sexual
EE4	NA	25	EE	F	0	sexual
EE4	NA	25	EE	F	0	sexual
EE4	NA	25	EE	F	0	sexual
EE4	NA	25	EE	F	0	sexual
EE4	NA	25	EE	F	0	sexual
EE4	NA	25	EE	F	0	sexual
EE4	NA	25	EE	F	0	sexual
EE4	NA	25	EE	F	0	sexual
EE4	NA	25	EE	F	0	sexual
EE4	NA	25	EE	F	0	sexual
EE4	NA	25	EE	F	0	sexual
EE4	NA	25	EE	F	0	sexual
EE4	NA	25	EE	F	0	sexual
EE4	NA	25	EE	F	0	sexual
EE4	NA	25	EE	F	0	sexual
EE4	NA	25	EE	F	0	sexual
EE4	NA	25	EE	F	0	sexual
EE4	NA	25	EE	F	0	sexual
EE4	NA	25	EE	F	0	sexual
EE4	NA	25	EE	F	0	sexual
EE4	NA	25	EE	F	0	sexual
EE4	NA	25	EE	F	0	sexual
EE4	NA	25	EE	F	0	sexual
EE4	NA	25	EE	F	0	sexual
EE5	NA	25	EE	F	0	sexual
EE5	NA	25	EE	F	0	sexual
EE5	NA	25	EE	F	0	sexual
EE5	NA	25	EE	F	0	sexual
EE5	NA	25	EE	F	0	sexual
EE5	NA	25	EE	F	0	sexual
EE5	NA	25	EE	F	0	sexual
EE5	NA	25	EE	F	0	sexual
EE5	NA	25	EE	F	0	sexual
EE5	NA	25	EE	F	0	sexual
EE5	NA	25	EE	F	0	sexual
EE5	NA	25	EE	F	0	sexual
EE5	NA	25	EE	F	0	sexual
EE5	NA	25	EE	F	0	sexual
EE5	NA	25	EE	F	0	sexual
EE5	NA	25	EE	F	0	sexual
EE5	NA	25	EE	F	0	sexual
EE5	NA	25	EE	F	0	sexual
EE5	NA	25	EE	F	0	sexual
EE5	NA	25	EE	F	0	sexual
EE5	NA	25	EE	F	0	sexual
EE5	NA	25	EE	F	0	sexual
EE5	NA	25	EE	F	0	sexual
EE5	NA	25	EE	F	0	sexual
EE6	NA	25	EE	F	0	sexual
EE6	NA	25	EE	F	0	sexual
EE6	NA	25	EE	F	0	sexual
EE6	NA	25	EE	F	0	sexual
EE6	NA	25	EE	F	0	sexual
EE6	NA	25	EE	F	0	sexual
EE6	NA	25	EE	F	0	sexual
EE6	NA	25	EE	F	0	sexual
EE6	NA	25	EE	F	0	sexual
EE6	NA	25	EE	F	0	sexual
EE6	NA	25	EE	F	0	sexual
EE6	NA	25	EE	F	0	sexual
TT1	NA	24	TT	F	0	sexual
TT1	NA	24	TT	F	0	sexual
TT1	NA	24	TT	F	0	sexual
TT1	NA	24	TT	F	0	sexual
TT1	NA	24	TT	F	0	sexual
TT1	NA	24	TT	F	0	sexual
TT1	NA	24	TT	F	0	sexual
TT1	NA	24	TT	F	0	sexual
TT1	NA	24	TT	F	0	sexual
TT1	NA	24	TT	F	0	sexual
TT1	NA	24	TT	F	0	sexual
TT1	NA	24	TT	F	0	sexual
TT1	NA	24	TT	F	0	sexual
TT1	NA	24	TT	F	0	sexual
TT1	NA	24	TT	F	0	sexual
TT1	NA	24	TT	F	0	sexual
TT1	NA	24	TT	F	0	sexual
TT1	NA	24	TT	F	0	sexual
TT1	NA	24	TT	F	0	sexual
TT1	NA	24	TT	F	0	sexual
TT1	NA	24	TT	F	0	sexual
TT1	NA	24	TT	F	0	sexual
TT1	NA	24	TT	F	0	sexual
TT1	NA	24	TT	F	0	sexual
TT2	NA	24	TT	F	0	sexual
TT2	NA	24	TT	F	0	sexual
TT2	NA	24	TT	F	0	sexual
TT2	NA	24	TT	F	0	sexual
TT2	NA	24	TT	F	0	sexual
TT2	NA	24	TT	F	0	sexual
TT2	NA	24	TT	F	0	sexual
TT2	NA	24	TT	F	0	sexual
TT2	NA	24	TT	F	0	sexual
TT2	NA	24	TT	F	0	sexual
TT2	NA	24	TT	F	0	sexual
TT2	NA	24	TT	F	0	sexual
TT2	NA	24	TT	F	0	sexual
TT2	NA	24	TT	F	0	sexual
TT2	NA	24	TT	F	0	sexual
TT2	NA	24	TT	F	0	sexual
TT2	NA	24	TT	F	0	sexual
TT2	NA	24	TT	F	0	sexual
TT2	NA	24	TT	F	0	sexual
TT2	NA	24	TT	F	0	sexual
TT2	NA	24	TT	F	0	sexual
TT2	NA	24	TT	F	0	sexual
TT2	NA	24	TT	F	0	sexual
TT2	NA	24	TT	F	0	sexual
TT2	NA	24	TT	F	0	sexual
TT2	NA	24	TT	F	0	sexual
TT2	NA	24	TT	F	0	sexual
TT2	NA	24	TT	F	0	sexual
TT2	NA	24	TT	F	0	sexual
TT2	NA	24	TT	F	0	sexual
TT2	NA	24	TT	F	0	sexual
TT2	NA	24	TT	F	0	sexual
TT2	NA	24	TT	F	0	sexual
TT2	NA	24	TT	F	0	sexual
TT2	NA	24	TT	F	0	sexual
TT2	NA	24	TT	F	0	sexual
TT2	NA	24	TT	F	0	sexual
TT2	NA	24	TT	F	0	sexual
TT2	NA	24	TT	F	0	sexual
TT2	NA	24	TT	F	0	sexual
TT2	NA	24	TT	F	0	sexual
TT2	NA	24	TT	F	0	sexual
TT2	NA	24	TT	F	0	sexual
TT2	NA	24	TT	F	0	sexual
TT2	NA	24	TT	F	0	sexual
TT2	NA	24	TT	F	0	sexual
TT2	NA	24	TT	F	0	sexual
TT2	NA	24	TT	F	0	sexual
TT2	NA	24	TT	F	0	sexual
TT2	NA	24	TT	F	0	sexual
TT2	NA	24	TT	F	0	sexual
TT2	NA	24	TT	F	0	sexual
TT2	NA	24	TT	F	0	sexual
TT2	NA	24	TT	F	0	sexual
TT2	NA	24	TT	F	0	sexual
TT2	NA	24	TT	F	0	sexual
TT2	NA	24	TT	F	0	sexual
TT2	NA	24	TT	F	0	sexual
TT2	NA	24	TT	F	0	sexual
TT2	NA	24	TT	F	0	sexual
TT2	NA	24	TT	F	0	sexual
TT2	NA	24	TT	F	0	sexual
TT2	NA	24	TT	F	0	sexual
TT2	NA	24	TT	F	0	sexual
TT2	NA	24	TT	F	0	sexual
TT2	NA	24	TT	F	0	sexual
TT2	NA	24	TT	F	0	sexual
TT2	NA	24	TT	F	0	sexual
TT2	NA	24	TT	F	0	sexual
TT2	NA	24	TT	F	0	sexual
TT2	NA	24	TT	F	0	sexual
TT2	NA	24	TT	F	0	sexual
TT2	NA	24	TT	F	0	sexual
TT2	NA	24	TT	F	0	sexual
TT2	NA	24	TT	F	0	sexual
TT2	NA	24	TT	F	0	sexual
TT2	NA	24	TT	F	0	sexual
TT2	NA	24	TT	F	0	sexual
TT2	NA	24	TT	F	0	sexual
TT2	NA	24	TT	F	0	sexual
TT2	NA	24	TT	F	0	sexual
TT2	NA	24	TT	F	0	sexual
TT2	NA	24	TT	F	0	sexual
TT2	NA	24	TT	F	0	sexual
TT2	NA	24	TT	F	0	sexual
TT2	NA	24	TT	F	0	sexual
TT2	NA	24	TT	F	0	sexual
TT2	NA	24	TT	F	0	sexual
TT2	NA	24	TT	F	0	sexual
TT2	NA	24	TT	F	0	sexual
TT2	NA	24	TT	F	0	sexual
TT2	NA	24	TT	F	0	sexual
TT2	NA	24	TT	F	0	sexual
TT2	NA	24	TT	F	0	sexual
TT2	NA	24	TT	F	0	sexual
TT2	NA	24	TT	F	0	sexual
TT2	NA	24	TT	F	0	sexual
TT2	NA	24	TT	F	0	sexual
TT2	NA	24	TT	F	0	sexual
TT2	NA	24	TT	F	0	sexual
TT2	NA	24	TT	F	0	sexual
TT2	NA	24	TT	F	0	sexual
TT2	NA	24	TT	F	0	sexual
TT2	NA	24	TT	F	0	sexual
TT2	NA	24	TT	F	0	sexual
TT2	NA	24	TT	F	0	sexual
TT2	NA	24	TT	F	0	sexual
TT2	NA	24	TT	F	0	sexual
TT2	NA	24	TT	F	0	sexual
TT2	NA	24	TT	F	0	sexual
TT2	NA	24	TT	F	0	sexual
TT2	NA	24	TT	F	0	sexual
TT2	NA	24	TT	F	0	sexual
TT2	NA	24	TT	F	0	sexual
TT2	NA	24	TT	F	0	sexual
TT2	NA	24	TT	F	0	sexual
TT2	NA	24	TT	F	0	sexual
TT2	NA	24	TT	F	0	sexual
TT2	NA	24	TT	F	0	sexual
TT2	NA	24	TT	F	0	sexual
TT2	NA	24	TT	F	0	sexual
TT2	NA	24	TT	F	0	sexual
TT2	NA	24	TT	F	0	sexual
TT2	NA	24	TT	F	0	sexual
TT2	NA	24	TT	F	0	sexual
TT2	NA	24	TT	F	0	sexual
TT3	NA	24	TT	F	0	sexual
TT3	NA	24	TT	F	0	sexual
TT3	NA	24	TT	F	0	sexual
TT3	NA	24	TT	F	0	sexual
TT3	NA	24	TT	F	0	sexual
TT3	NA	24	TT	F	0	sexual
TT3	NA	24	TT	F	0	sexual
TT3	NA	24	TT	F	0	sexual
TT3	NA	24	TT	F	0	sexual
TT3	NA	24	TT	F	0	sexual
TT3	NA	24	TT	F	0	sexual
TT3	NA	24	TT	F	0	sexual
TT3	NA	24	TT	F	0	sexual
TT3	NA	24	TT	F	0	sexual
TT3	NA	24	TT	F	0	sexual
TT3	NA	24	TT	F	0	sexual
TT3	NA	24	TT	F	0	sexual
TT3	NA	24	TT	F	0	sexual
TT3	NA	24	TT	F	0	sexual
TT3	NA	24	TT	F	0	sexual
TT3	NA	24	TT	F	0	sexual
TT3	NA	24	TT	F	0	sexual
TT3	NA	24	TT	F	0	sexual
TT3	NA	24	TT	F	0	sexual
TT3	NA	24	TT	F	0	sexual
TT3	NA	24	TT	F	0	sexual
TT3	NA	24	TT	F	0	sexual
TT3	NA	24	TT	F	0	sexual
TT3	NA	24	TT	F	0	sexual
TT3	NA	24	TT	F	0	sexual
TT3	NA	24	TT	F	0	sexual
TT4	NA	24	TT	F	0	sexual
TT4	NA	24	TT	F	0	sexual
TT4	NA	24	TT	F	0	sexual
TT4	NA	24	TT	F	0	sexual
TT4	NA	24	TT	F	0	sexual
TT4	NA	24	TT	F	0	sexual
TT4	NA	24	TT	F	0	sexual
TT4	NA	24	TT	F	0	sexual
TT4	NA	24	TT	F	0	sexual
TT4	NA	24	TT	F	0	sexual
TT4	NA	24	TT	F	0	sexual
TT4	NA	24	TT	F	0	sexual
TT4	NA	24	TT	F	0	sexual
TT4	NA	24	TT	F	0	sexual
TT4	NA	24	TT	F	0	sexual
TT4	NA	24	TT	F	0	sexual
TT5	NA	24	TT	F	0	sexual
TT5	NA	24	TT	F	0	sexual
TT5	NA	24	TT	F	0	sexual
TT5	NA	24	TT	F	0	sexual
TT5	NA	24	TT	F	0	sexual
TT5	NA	24	TT	F	0	sexual
TT5	NA	24	TT	F	0	sexual
TT5	NA	24	TT	F	0	sexual
TT5	NA	24	TT	F	0	sexual
TT5	NA	24	TT	F	0	sexual
TT5	NA	24	TT	F	0	sexual
TT5	NA	24	TT	F	0	sexual
TT5	NA	24	TT	F	0	sexual
TT5	NA	24	TT	F	0	sexual
TT5	NA	24	TT	F	0	sexual
TT5	NA	24	TT	F	0	sexual
TT5	NA	24	TT	F	0	sexual
TT5	NA	24	TT	F	0	sexual
TT5	NA	24	TT	F	0	sexual
TT5	NA	24	TT	F	0	sexual
NN1	NA	25	NN	F	0	sexual
NN1	NA	25	NN	F	0	sexual
NN1	NA	25	NN	F	0	sexual
NN1	NA	25	NN	F	0	sexual
NN1	NA	25	NN	F	0	sexual
NN1	NA	25	NN	F	0	sexual
NN1	NA	25	NN	F	0	sexual
NN1	NA	25	NN	F	0	sexual
NN1	NA	25	NN	F	0	sexual
NN1	NA	25	NN	F	0	sexual
NN1	NA	25	NN	F	0	sexual
NN1	NA	25	NN	F	0	sexual
NN1	NA	25	NN	F	0	sexual
NN1	NA	25	NN	F	0	sexual
NN1	NA	25	NN	F	0	sexual
NN1	NA	25	NN	F	0	sexual
NN1	NA	25	NN	F	0	sexual
NN1	NA	25	NN	F	0	sexual
NN1	NA	25	NN	F	0	sexual
NN1	NA	25	NN	F	0	sexual
NN1	NA	25	NN	F	0	sexual
NN1	NA	25	NN	F	0	sexual
NN1	NA	25	NN	F	0	sexual
NN1	NA	25	NN	F	0	sexual
NN1	NA	25	NN	F	0	sexual
NN1	NA	25	NN	F	0	sexual
NN1	NA	25	NN	F	0	sexual
NN1	NA	25	NN	F	0	sexual
NN1	NA	25	NN	F	0	sexual
NN1	NA	25	NN	F	0	sexual
NN1	NA	25	NN	F	0	sexual
NN1	NA	25	NN	F	0	sexual
NN1	NA	25	NN	F	0	sexual
NN1	NA	25	NN	F	0	sexual
NN1	NA	25	NN	F	0	sexual
NN1	NA	25	NN	F	0	sexual
NN1	NA	25	NN	F	0	sexual
NN1	NA	25	NN	F	0	sexual
NN1	NA	25	NN	F	0	sexual
NN1	NA	25	NN	F	0	sexual
NN1	NA	25	NN	F	0	sexual
NN1	NA	25	NN	F	0	sexual
NN1	NA	25	NN	F	0	sexual
NN1	NA	25	NN	F	0	sexual
NN1	NA	25	NN	F	0	sexual
NN1	NA	25	NN	F	0	sexual
NN1	NA	25	NN	F	0	sexual
NN1	NA	25	NN	F	0	sexual
NN1	NA	25	NN	F	0	sexual
NN1	NA	25	NN	F	0	sexual
NN1	NA	25	NN	F	0	sexual
NN1	NA	25	NN	F	0	sexual
NN1	NA	25	NN	F	0	sexual
NN1	NA	25	NN	F	0	sexual
NN1	NA	25	NN	F	0	sexual
NN1	NA	25	NN	F	0	sexual
NN1	NA	25	NN	F	0	sexual
NN1	NA	25	NN	F	0	sexual
NN1	NA	25	NN	F	0	sexual
NN1	NA	25	NN	F	0	sexual
NN2	NA	25	NN	F	0	sexual
NN2	NA	25	NN	F	0	sexual
NN2	NA	25	NN	F	0	sexual
NN2	NA	25	NN	F	0	sexual
NN2	NA	25	NN	F	0	sexual
NN2	NA	25	NN	F	0	sexual
NN2	NA	25	NN	F	0	sexual
NN2	NA	25	NN	F	0	sexual
NN2	NA	25	NN	F	0	sexual
NN2	NA	25	NN	F	0	sexual
NN2	NA	25	NN	F	0	sexual
NN2	NA	25	NN	F	0	sexual
NN2	NA	25	NN	F	0	sexual
NN2	NA	25	NN	F	0	sexual
NN2	NA	25	NN	F	0	sexual
NN2	NA	25	NN	F	0	sexual
NN2	NA	25	NN	F	0	sexual
NN2	NA	25	NN	F	0	sexual
NN2	NA	25	NN	F	0	sexual
NN2	NA	25	NN	F	0	sexual
NN2	NA	25	NN	F	0	sexual
NN2	NA	25	NN	F	0	sexual
NN2	NA	25	NN	F	0	sexual
NN2	NA	25	NN	F	0	sexual
NN2	NA	25	NN	F	0	sexual
NN2	NA	25	NN	F	0	sexual
NN2	NA	25	NN	F	0	sexual
NN2	NA	25	NN	F	0	sexual
NN2	NA	25	NN	F	0	sexual
NN2	NA	25	NN	F	0	sexual
NN2	NA	25	NN	F	0	sexual
NN2	NA	25	NN	F	0	sexual
NN2	NA	25	NN	F	0	sexual
NN2	NA	25	NN	F	0	sexual
NN2	NA	25	NN	F	0	sexual
NN2	NA	25	NN	F	0	sexual
NN2	NA	25	NN	F	0	sexual
NN2	NA	25	NN	F	0	sexual
NN2	NA	25	NN	F	0	sexual
NN2	NA	25	NN	F	0	sexual
NN2	NA	25	NN	F	0	sexual
NN2	NA	25	NN	F	0	sexual
NN2	NA	25	NN	F	0	sexual
NN2	NA	25	NN	F	0	sexual
NN2	NA	25	NN	F	0	sexual
NN2	NA	25	NN	F	0	sexual
NN2	NA	25	NN	F	0	sexual
NN2	NA	25	NN	F	0	sexual
NN2	NA	25	NN	F	0	sexual
NN2	NA	25	NN	F	0	sexual
NN2	NA	25	NN	F	0	sexual
NN2	NA	25	NN	F	0	sexual
NN2	NA	25	NN	F	0	sexual
NN2	NA	25	NN	F	0	sexual
NN2	NA	25	NN	F	0	sexual
NN2	NA	25	NN	F	0	sexual
NN2	NA	25	NN	F	0	sexual
NN2	NA	25	NN	F	0	sexual
NN2	NA	25	NN	F	0	sexual
NN2	NA	25	NN	F	0	sexual
NN2	NA	25	NN	F	0	sexual
NN2	NA	25	NN	F	0	sexual
NN2	NA	25	NN	F	0	sexual
NN2	NA	25	NN	F	0	sexual
NN2	NA	25	NN	F	0	sexual
NN2	NA	25	NN	F	0	sexual
NN2	NA	25	NN	F	0	sexual
NN2	NA	25	NN	F	0	sexual
NN2	NA	25	NN	F	0	sexual
NN2	NA	25	NN	F	0	sexual
NN2	NA	25	NN	F	0	sexual
NN2	NA	25	NN	F	0	sexual
NN2	NA	25	NN	F	0	sexual
NN2	NA	25	NN	F	0	sexual
NN2	NA	25	NN	F	0	sexual
NN2	NA	25	NN	F	0	sexual
NN2	NA	25	NN	F	0	sexual
NN2	NA	25	NN	F	0	sexual
NN2	NA	25	NN	F	0	sexual
NN2	NA	25	NN	F	0	sexual
NN2	NA	25	NN	F	0	sexual
NN2	NA	25	NN	F	0	sexual
NN3	NA	25	NN	M	0	sexual
NN3	NA	25	NN	M	0	sexual
NN3	NA	25	NN	M	0	sexual
NN3	NA	25	NN	M	0	sexual
NN3	NA	25	NN	M	0	sexual
NN3	NA	25	NN	M	0	sexual
NN3	NA	25	NN	M	0	sexual
NN3	NA	25	NN	M	0	sexual
NN3	NA	25	NN	M	0	sexual
NN3	NA	25	NN	M	0	sexual
NN3	NA	25	NN	M	0	sexual
NN3	NA	25	NN	M	0	sexual
NN3	NA	25	NN	M	0	sexual
NN3	NA	25	NN	M	0	sexual
NN3	NA	25	NN	M	0	sexual
NN3	NA	25	NN	M	0	sexual
NN3	NA	25	NN	M	0	sexual
NN3	NA	25	NN	M	0	sexual
NN3	NA	25	NN	M	0	sexual
NN3	NA	25	NN	M	0	sexual
NN3	NA	25	NN	M	0	sexual
NN3	NA	25	NN	M	0	sexual
NN3	NA	25	NN	M	0	sexual
NN3	NA	25	NN	M	0	sexual
NN3	NA	25	NN	M	0	sexual
NN3	NA	25	NN	M	0	sexual
NN3	NA	25	NN	M	0	sexual
NN4	NA	25	NN	M	0	sexual
NN4	NA	25	NN	M	0	sexual
NN4	NA	25	NN	M	0	sexual
NN4	NA	25	NN	M	0	sexual
NN4	NA	25	NN	M	0	sexual
NN4	NA	25	NN	M	0	sexual
NN4	NA	25	NN	M	0	sexual
NN4	NA	25	NN	M	0	sexual
NN4	NA	25	NN	M	0	sexual
NN4	NA	25	NN	M	0	sexual
NN4	NA	25	NN	M	0	sexual
NN4	NA	25	NN	M	0	sexual
NN4	NA	25	NN	M	0	sexual
NN4	NA	25	NN	M	0	sexual
NN4	NA	25	NN	M	0	sexual
NN4	NA	25	NN	M	0	sexual
NN4	NA	25	NN	M	0	sexual
NN4	NA	25	NN	M	0	sexual
NN4	NA	25	NN	M	0	sexual
NN4	NA	25	NN	M	0	sexual
NN4	NA	25	NN	M	0	sexual
NN4	NA	25	NN	M	0	sexual
NN4	NA	25	NN	M	0	sexual
NN4	NA	25	NN	M	0	sexual
NN4	NA	25	NN	M	0	sexual
NN4	NA	25	NN	M	0	sexual
NN4	NA	25	NN	M	0	sexual
NN4	NA	25	NN	M	0	sexual
NN4	NA	25	NN	M	0	sexual
NN4	NA	25	NN	M	0	sexual
NN4	NA	25	NN	M	0	sexual
NN4	NA	25	NN	M	0	sexual
NN4	NA	25	NN	M	0	sexual
TT6	NA	24	TT	M	0	sexual
TT6	NA	24	TT	M	0	sexual
TT6	NA	24	TT	M	0	sexual
TT6	NA	24	TT	M	0	sexual
TT6	NA	24	TT	M	0	sexual
TT6	NA	24	TT	M	0	sexual
TT6	NA	24	TT	M	0	sexual
TT6	NA	24	TT	M	0	sexual
TT6	NA	24	TT	M	0	sexual
TT6	NA	24	TT	M	0	sexual
TT6	NA	24	TT	M	0	sexual
TT6	NA	24	TT	M	0	sexual
TT6	NA	24	TT	M	0	sexual
TT6	NA	24	TT	M	0	sexual
TT6	NA	24	TT	M	0	sexual
TT6	NA	24	TT	M	0	sexual
TT6	NA	24	TT	M	0	sexual
TT6	NA	24	TT	M	0	sexual
TT6	NA	24	TT	M	0	sexual
TT6	NA	24	TT	M	0	sexual
TT6	NA	24	TT	M	0	sexual
TT6	NA	24	TT	M	0	sexual
TT6	NA	24	TT	M	0	sexual
TT6	NA	24	TT	M	0	sexual
TT6	NA	24	TT	M	0	sexual
TT7	NA	24	TT	M	0	sexual
TT7	NA	24	TT	M	0	sexual
TT7	NA	24	TT	M	0	sexual
TT7	NA	24	TT	M	0	sexual
TT7	NA	24	TT	M	0	sexual
TT7	NA	24	TT	M	0	sexual
TT7	NA	24	TT	M	0	sexual
TT7	NA	24	TT	M	0	sexual
TT7	NA	24	TT	M	0	sexual
TT7	NA	24	TT	M	0	sexual
TT7	NA	24	TT	M	0	sexual
TT7	NA	24	TT	M	0	sexual
TT7	NA	24	TT	M	0	sexual
TT7	NA	24	TT	M	0	sexual
TT7	NA	24	TT	M	0	sexual
TT7	NA	24	TT	M	0	sexual
TT7	NA	24	TT	M	0	sexual
TT7	NA	24	TT	M	0	sexual
TT7	NA	24	TT	M	0	sexual
TT7	NA	24	TT	M	0	sexual
TT7	NA	24	TT	M	0	sexual
TT7	NA	24	TT	M	0	sexual
TT7	NA	24	TT	M	0	sexual
TT7	NA	24	TT	M	0	sexual
TT7	NA	24	TT	M	0	sexual
TT7	NA	24	TT	M	0	sexual
TT7	NA	24	TT	M	0	sexual
TT7	NA	24	TT	M	0	sexual
TT7	NA	24	TT	M	0	sexual
TT7	NA	24	TT	M	0	sexual
TT7	NA	24	TT	M	0	sexual
TT7	NA	24	TT	M	0	sexual
TT7	NA	24	TT	M	0	sexual
TT7	NA	24	TT	M	0	sexual
TT7	NA	24	TT	M	0	sexual
TT7	NA	24	TT	M	0	sexual
TT7	NA	24	TT	M	0	sexual
TT7	NA	24	TT	M	0	sexual
TT7	NA	24	TT	M	0	sexual
EE7	NA	25	EE	M	0	sexual
EE7	NA	25	EE	M	0	sexual
EE7	NA	25	EE	M	0	sexual
EE7	NA	25	EE	M	0	sexual
EE7	NA	25	EE	M	0	sexual
EE7	NA	25	EE	M	0	sexual
EE7	NA	25	EE	M	0	sexual
EE7	NA	25	EE	M	0	sexual
EE7	NA	25	EE	M	0	sexual
EE7	NA	25	EE	M	0	sexual
EE7	NA	25	EE	M	0	sexual
PP1	PP	25	PP	F	0	sexual
PP1	PP	25	PP	F	0	sexual
PP1	PP	25	PP	F	0	sexual
PP1	PP	25	PP	F	0	sexual
PP1	PP	25	PP	F	0	sexual
PP1	PP	25	PP	F	0	sexual
PP1	PP	25	PP	F	0	sexual
PP1	PP	25	PP	F	0	sexual
PP1	PP	25	PP	F	0	sexual
PP1	PP	25	PP	F	0	sexual
PP1	PP	25	PP	F	0	sexual
PP1	PP	25	PP	F	0	sexual
PP1	PP	25	PP	F	0	sexual
PP1	PP	25	PP	F	0	sexual
PP1	PP	25	PP	F	0	sexual
PP1	PP	25	PP	F	0	sexual
PP1	PP	25	PP	F	0	sexual
PP1	PP	25	PP	F	0	sexual
PP1	PP	25	PP	F	0	sexual
PP1	PP	25	PP	F	0	sexual
PP1	PP	25	PP	F	0	sexual
PP1	PP	25	PP	F	0	sexual
PP1	PP	25	PP	F	0	sexual
PP1	PP	25	PP	F	0	sexual
OO1	NA	25	OO	F	0	sexual
OO1	NA	25	OO	F	0	sexual
OO1	NA	25	OO	F	0	sexual
OO1	NA	25	OO	F	0	sexual
OO1	NA	25	OO	F	0	sexual
OO1	NA	25	OO	F	0	sexual
OO1	NA	25	OO	F	0	sexual
OO1	NA	25	OO	F	0	sexual
OO1	NA	25	OO	F	0	sexual
OO1	NA	25	OO	F	0	sexual
OO1	NA	25	OO	F	0	sexual
OO1	NA	25	OO	F	0	sexual
OO1	NA	25	OO	F	0	sexual
OO1	NA	25	OO	F	0	sexual
OO1	NA	25	OO	F	0	sexual
OO1	NA	25	OO	F	0	sexual
OO1	NA	25	OO	F	0	sexual
OO1	NA	25	OO	F	0	sexual
OO1	NA	25	OO	F	0	sexual
OO1	NA	25	OO	F	0	sexual
OO1	NA	25	OO	F	0	sexual
OO1	NA	25	OO	F	0	sexual
OO1	NA	25	OO	F	0	sexual
OO1	NA	25	OO	F	0	sexual
OO1	NA	25	OO	F	0	sexual
OO1	NA	25	OO	F	0	sexual
OO1	NA	25	OO	F	0	sexual
OO1	NA	25	OO	F	0	sexual
OO1	NA	25	OO	F	0	sexual
OO1	NA	25	OO	F	0	sexual
OO1	NA	25	OO	F	0	sexual
OO1	NA	25	OO	F	0	sexual
OO1	NA	25	OO	F	0	sexual
OO1	NA	25	OO	F	0	sexual
OO1	NA	25	OO	F	0	sexual
OO1	NA	25	OO	F	0	sexual
OO1	NA	25	OO	F	0	sexual
OO1	NA	25	OO	F	0	sexual
OO1	NA	25	OO	F	0	sexual
OO1	NA	25	OO	F	0	sexual
OO1	NA	25	OO	F	0	sexual
OO1	NA	25	OO	F	0	sexual
OO2	NA	25	OO	M	0	sexual
OO2	NA	25	OO	M	0	sexual
OO2	NA	25	OO	M	0	sexual
OO2	NA	25	OO	M	0	sexual
OO2	NA	25	OO	M	0	sexual
OO2	NA	25	OO	M	0	sexual
OO2	NA	25	OO	M	0	sexual
OO2	NA	25	OO	M	0	sexual
OO2	NA	25	OO	M	0	sexual
OO2	NA	25	OO	M	0	sexual
OO2	NA	25	OO	M	0	sexual
OO2	NA	25	OO	M	0	sexual
OO2	NA	25	OO	M	0	sexual
OO2	NA	25	OO	M	0	sexual
OO2	NA	25	OO	M	0	sexual
OO2	NA	25	OO	M	0	sexual
OO2	NA	25	OO	M	0	sexual
OO2	NA	25	OO	M	0	sexual
OO2	NA	25	OO	M	0	sexual
OO2	NA	25	OO	M	0	sexual
OO2	NA	25	OO	M	0	sexual
OO2	NA	25	OO	M	0	sexual
OO2	NA	25	OO	M	0	sexual
OO2	NA	25	OO	M	0	sexual
OO2	NA	25	OO	M	0	sexual
OO2	NA	25	OO	M	0	sexual
OO2	NA	25	OO	M	0	sexual
OO2	NA	25	OO	M	0	sexual
OO2	NA	25	OO	M	0	sexual
OO2	NA	25	OO	M	0	sexual
OO2	NA	25	OO	M	0	sexual
OO2	NA	25	OO	M	0	sexual
OO2	NA	25	OO	M	0	sexual
OO2	NA	25	OO	M	0	sexual
OO2	NA	25	OO	M	0	sexual
OO2	NA	25	OO	M	0	sexual
OO2	NA	25	OO	M	0	sexual
OO2	NA	25	OO	M	0	sexual
OO2	NA	25	OO	M	0	sexual
OO2	NA	25	OO	M	0	sexual
OO2	NA	25	OO	M	0	sexual
OO2	NA	25	OO	M	0	sexual
OO2	NA	25	OO	M	0	sexual
OO2	NA	25	OO	M	0	sexual
OO2	NA	25	OO	M	0	sexual
OO2	NA	25	OO	M	0	sexual
OO2	NA	25	OO	M	0	sexual
OO2	NA	25	OO	M	0	sexual
OO2	NA	25	OO	M	0	sexual
OO2	NA	25	OO	M	0	sexual
OO2	NA	25	OO	M	0	sexual
OO2	NA	25	OO	M	0	sexual
OO3	NA	25	OO	M	0	sexual
OO3	NA	25	OO	M	0	sexual
OO3	NA	25	OO	M	0	sexual
OO3	NA	25	OO	M	0	sexual
OO3	NA	25	OO	M	0	sexual
OO3	NA	25	OO	M	0	sexual
OO3	NA	25	OO	M	0	sexual
OO3	NA	25	OO	M	0	sexual
OO3	NA	25	OO	M	0	sexual
OO3	NA	25	OO	M	0	sexual
OO3	NA	25	OO	M	0	sexual
OO3	NA	25	OO	M	0	sexual
OO3	NA	25	OO	M	0	sexual
OO3	NA	25	OO	M	0	sexual
OO3	NA	25	OO	M	0	sexual
OO3	NA	25	OO	M	0	sexual
OO3	NA	25	OO	M	0	sexual
OO4	NA	25	OO	F	0	sexual
OO4	NA	25	OO	F	0	sexual
OO4	NA	25	OO	F	0	sexual
OO4	NA	25	OO	F	0	sexual
OO4	NA	25	OO	F	0	sexual
OO4	NA	25	OO	F	0	sexual
OO4	NA	25	OO	F	0	sexual
OO4	NA	25	OO	F	0	sexual
OO4	NA	25	OO	F	0	sexual
OO4	NA	25	OO	F	0	sexual
OO4	NA	25	OO	F	0	sexual
OO4	NA	25	OO	F	0	sexual
OO5	NA	25	OO	F	0	sexual
OO5	NA	25	OO	F	0	sexual
OO5	NA	25	OO	F	0	sexual
OO5	NA	25	OO	F	0	sexual
OO5	NA	25	OO	F	0	sexual
OO5	NA	25	OO	F	0	sexual
OO5	NA	25	OO	F	0	sexual
OO5	NA	25	OO	F	0	sexual
OO5	NA	25	OO	F	0	sexual
OO5	NA	25	OO	F	0	sexual
OO5	NA	25	OO	F	0	sexual
OO5	NA	25	OO	F	0	sexual
OO5	NA	25	OO	F	0	sexual
OO5	NA	25	OO	F	0	sexual
OO5	NA	25	OO	F	0	sexual
OO5	NA	25	OO	F	0	sexual
OO5	NA	25	OO	F	0	sexual
OO5	NA	25	OO	F	0	sexual
OO5	NA	25	OO	F	0	sexual
OO5	NA	25	OO	F	0	sexual
OO5	NA	25	OO	F	0	sexual
OO5	NA	25	OO	F	0	sexual
OO5	NA	25	OO	F	0	sexual
OO5	NA	25	OO	F	0	sexual
OO5	NA	25	OO	F	0	sexual
OO5	NA	25	OO	F	0	sexual
OO5	NA	25	OO	F	0	sexual
OO5	NA	25	OO	F	0	sexual
OO5	NA	25	OO	F	0	sexual
OO5	NA	25	OO	F	0	sexual
OO5	NA	25	OO	F	0	sexual
OO5	NA	25	OO	F	0	sexual
OO5	NA	25	OO	F	0	sexual
OO5	NA	25	OO	F	0	sexual
OO5	NA	25	OO	F	0	sexual
OO5	NA	25	OO	F	0	sexual
OO5	NA	25	OO	F	0	sexual
OO5	NA	25	OO	F	0	sexual
OO5	NA	25	OO	F	0	sexual
OO5	NA	25	OO	F	0	sexual
OO5	NA	25	OO	F	0	sexual
